## 1 **Neutral Drift and Threshold Selection Promote Phenotypic Variation**

2 **Authors:** Ayşe N. Erdoğan<sup>1</sup>, Pouria Dasmeh<sup>2,3,4</sup>, Raymond D. Socha<sup>1</sup>, John Z. Chen<sup>1</sup>, Ben Life<sup>1</sup>,  
3 Rachel Jun<sup>1</sup>, Linda Kiritchkov<sup>1</sup>, Dan Kehila<sup>1</sup>, Adrian W.R. Serohijos<sup>2,3</sup>, Nobuhiko Tokuriki<sup>1</sup>

### 4 **Affiliations:**

5 <sup>1</sup>Michael Smith Laboratories, University of British Columbia, Vancouver, V6T 1Z4, BC, Canada

6 <sup>2</sup>Département de biochimie, <sup>3</sup>Centre Robert-Cedergren en Bio-informatique et Génomique,  
7 Université de Montréal, 2900 Édouard-Montpetit, Montréal, Québec H3T 1J4, Canada

8 <sup>4</sup> Centre for Human Genetics, Marburg University, Marburg, Germany.

### 9 **Corresponding author:**

10 Nobuhiko Tokuriki

11 Email: [tokuriki@msl.ubc.ca](mailto:tokuriki@msl.ubc.ca),

12 Telephone: +1-604-822-8156,

13 Fax: +1-604-822-2114

### 14 **Abstract**

15 Phenotypic variations within a population exist on different scales of biological organization and  
16 play a central role in evolution by providing adaptive capacity at the population-level. Thus, the  
17 question of how evolution generates phenotypic variation within an evolving population is  
18 fundamental in evolutionary biology. Here we address this question by performing experimental  
19 evolution of an antibiotic resistance gene, VIM-2  $\beta$ -lactamase, combined with diverse  
20 biochemical assays and population genetics. We found that neutral drift, *i.e.*, evolution under a  
21 static environment, with a low antibiotic concentration can promote and maintain significant  
22 phenotypic variation within the population with >100-fold differences in resistance strength. We  
23 developed a model based on the phenotype-environment-fitness landscape generated with  
24 >5,000 VIM-2 variants, and demonstrated that the combination of “mutation-selection balance”  
25 and “threshold-like fitness-phenotype relationship” is sufficient to explain the generation of large  
26 phenotypic variation within the evolving population. Importantly, high-resistance conferring  
27 variants can emerge during neutral drift, without being a product of adaptation. Our findings  
28 provide a novel and simple mechanistic explanation for why most genes in nature, and by  
29 extension, systems and organisms, inherently exhibit phenotypic variation, and thus, population-  
30 level evolvability.

## 31 Introduction

32 A population often encounters and needs to adapt to environmental changes; otherwise, it could  
33 face extinction. Although the influx of new mutations can provide inheritable phenotypic change,  
34 they may be insufficient when environmental perturbations are sudden and large, therefore  
35 necessitating the pre-existence of phenotypic variation in natural populations<sup>1,2</sup>. Indeed,  
36 phenotypic variation at different scales of biological organizations, including at the protein level,  
37 is commonly observed both within populations and within species as a whole, pointing towards  
38 the importance of existence of such diversity as a major mechanism for providing evolving  
39 populations adaptive capacity, *i.e.*, population-level evolvability<sup>1,3-6</sup>. For example, the pre-  
40 existence of gene variants that confer different levels of antibiotic resistance in bacteria allows  
41 for the survival of the bacterial population upon a sudden increase in antibiotic concentration,  
42 where bacteria with high-resistance variants can rescue the population<sup>7</sup>. However, even though  
43 the importance of phenotypic variation is indeed well recognized, our understanding of the  
44 mechanisms for its generation and maintenance is limited<sup>8</sup>.

45 Phenotypic variation is often regarded as a by-product of “differential selection”, due to spatial  
46 and/or temporal environmental fluctuations<sup>8</sup>. It is also known that phenotypic traits that are not  
47 directly under selection pressure tend to exhibit variation, so-called hidden phenotypic  
48 variation<sup>5,8-12</sup>. However, these theories apply to only specific and limited evolutionary scenarios,  
49 and they cannot provide an explanation for the ubiquity of phenotypic variation observed in  
50 nature. For instance, recent experimental evolution studies demonstrated that bacterial  
51 populations evolved under constant, low-level antibiotic exposure resulting in heterogenous  
52 antibiotic resistance phenotypes, with a fraction of variants conferring high levels of resistance<sup>13-</sup>  
53 <sup>16</sup>. While these studies suggest that evolution in a simple and static environment may lead to  
54 phenotypic variation, the underlying mechanism for this is yet unknown.

55 Protein evolution under purifying selection in a static environment can be referred as “neutral  
56 drift”, where the accumulation of mutations occurs while the functionality of the protein is  
57 sustained above a certain threshold to maintain organismal fitness<sup>17-20</sup>. It is known that neutral  
58 drift promotes genotypic variation in proteins<sup>17,18</sup>. Nonetheless, these mutations can be non-  
59 neutral in their effect on the protein phenotype. This can also result in variation in non-  
60 physiological and promiscuous functions of the protein as they are not directly under the  
61 selection pressure<sup>20-24</sup>. However, it is unclear if neutral drift can generate and maintain  
62 phenotypic variation for the trait that is directly under selection pressure. If so, this provides a  
63 robust mechanistic explanation for the phenotypic variations that are commonly observed within  
64 a population and species, as most proteins have undergone neutral drift.

65 In this work, we addressed the question by conducting an evolutionary experiment on VIM-2  $\beta$ -

66 lactamase. We evolved VIM-2 under different evolutionary scenarios including neutral drift (**Fig.**  
67 **1**). We tracked changes in genotypic and phenotypic diversity within the population and  
68 examined evolutionary conditions that promote high phenotypic variation. Then, using an  
69 empirically obtained fitness landscape for VIM-2<sup>25,26</sup>, we simulated the evolution of VIM-2 and  
70 demonstrated that mutation-selection balance combined with a simple threshold relationship  
71 between the phenotype and fitness can easily result in the generation and maintenance of  
72 phenotypic diversity within an evolving population.

## 73 **Results**

### 74 ***Experimental evolution of VIM-2 $\beta$ -lactamase and characterizations of the populations.***

75 We conducted experimental evolution of VIM-2 by expressing it in an *Escherichia coli* strain (E.  
76 cloni 10G), and applying selection on agar plates with the required ampicillin concentration (**Fig.**  
77 **1a**). The minimum inhibitory concentration on an agar plate (MIC) of the *E. coli* strain without  
78 expressing any VIM-2 variant was 4  $\mu\text{g}/\text{mL}$  ampicillin, while expressing wild-type VIM-2 (*wtVIM-*  
79 *2*) conferred 32-fold higher resistance to the strain (MIC=128  $\mu\text{g}/\text{mL}$ ). *wtVIM-2* was first subjected  
80 to 18 rounds of directed evolution for higher antibiotic resistance (adaptive walk or AW) by  
81 gradually increasing the ampicillin concentration until the ampicillin resistance of the population  
82 was plateaued (at 4,096  $\mu\text{g}/\text{mL}$ , **Fig. 1b** and **Supp. Data 1**). This concentration was an apparent  
83 limit for the evolution since selection with the next 2-fold increase in concentration, 8,192  $\mu\text{g}/\text{mL}$   
84 ampicillin, did not yield any colonies after R12. Subsequently, the adapted population of VIM-2  
85 variants (*i.e.*, AW-R18) was divided into two lineages and further subjected to 100 rounds of  
86 neutral drift (ND) under a static environment (**Fig. 1b**). One lineage, ND<sub>Hi</sub>, was evolved with a high  
87 ampicillin concentration (1,000  $\mu\text{g}/\text{mL}$ ). The other lineage, ND<sub>Lo</sub>, was subjected to a low ampicillin  
88 concentration (10  $\mu\text{g}/\text{mL}$ ). In this way, we examined the behaviour of the same starting  
89 population under different evolution scenarios.

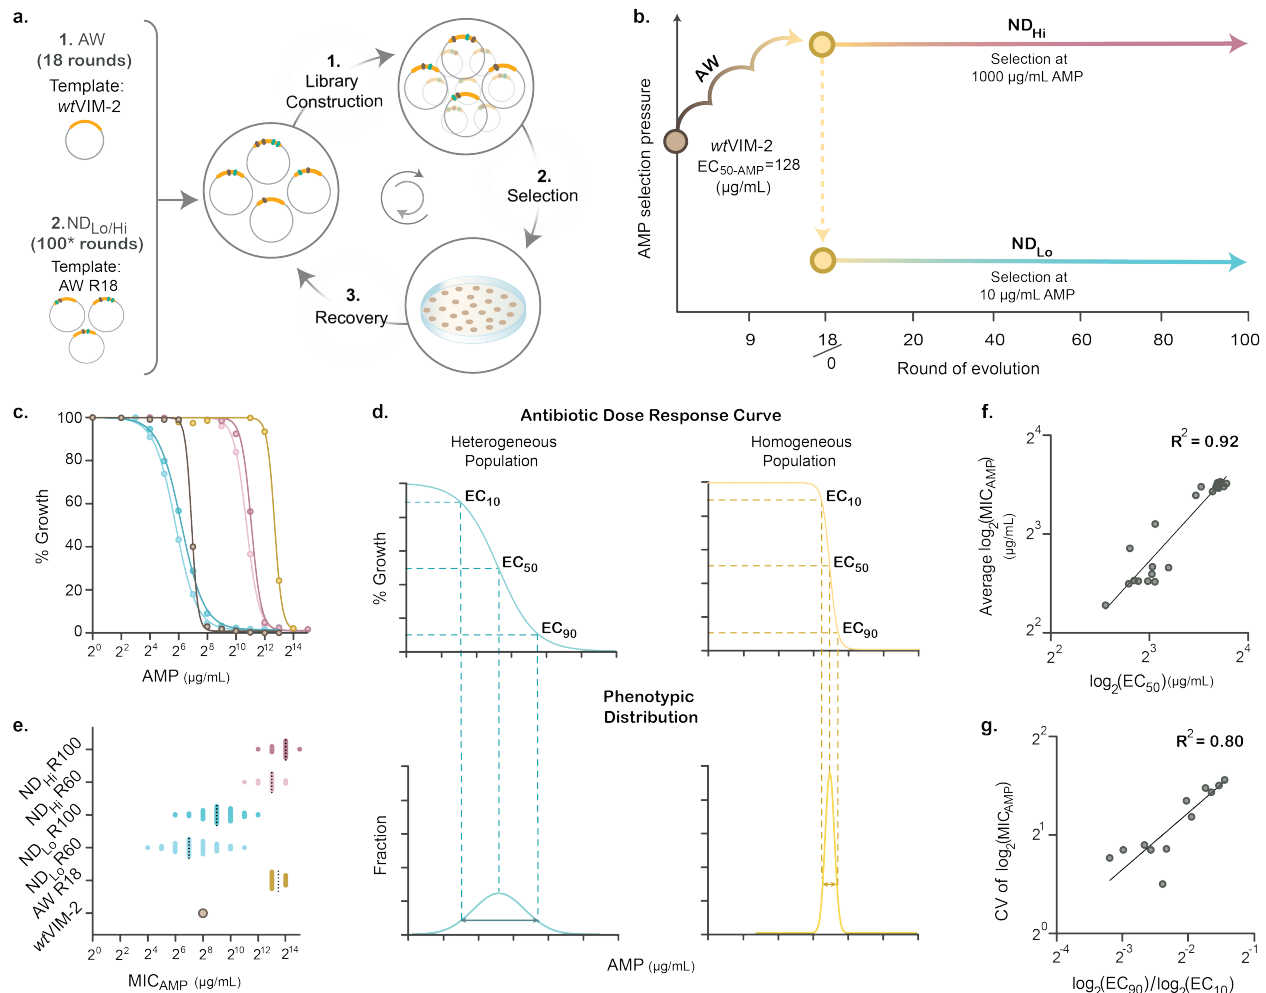

90

91 **Fig. 1. Scheme of experimental evolution of VIM-2 and analysis pipeline.** **a**, Overview of experimental evolution. **b**,  
 92 Scheme of the ampicillin concentrations used in the experimental evolution: During adaptive walk (AW), ampicillin  
 93 concentration in the selection media is gradually increased. After AW, the population is split into two lineages and  
 94 then subjected to 100 iterative rounds of neutral drift with high (1,000 µg/mL ampicillin, ND<sub>Hi</sub>) and low (10 µg/mL  
 95 ampicillin, ND<sub>Lo</sub>) concentrations of ampicillin. **c**, Representative population-level phenotypes (dose-response curves)  
 96 Refer to panel **e** for the colouring scheme. **d**, Illustration of how dose-response curves reflect the phenotypic  
 97 variation in the population. **e**, Representative phenotype measurements (MIC) of individual variants sampled along  
 98 each trajectory. **f**, **g**, Correlation between characteristics from the population-level phenotypic assay (dose-response  
 99 curve), and individual-level assays (MIC): MIC<sub>AMP</sub> values *versus* EC<sub>50</sub> (**f**) and coefficient of variation (CV) of  
 100 log<sub>2</sub>-transformed MIC<sub>AMP</sub> values *versus* log<sub>2</sub>-transformed EC<sub>90</sub>/EC<sub>10</sub> (**g**).

101 The phenotype of a population was determined by antibiotic dose-response growth assays on  
 102 the *E. coli* population expressing each VIM-2 library (**Fig. 1c**). The dose-response curve was fitted  
 103 to a sigmoidal function to obtain the effective concentrations of antibiotic that inhibits the  
 104 growth of 10, 50 and 90% (EC<sub>10</sub>, EC<sub>50</sub>, EC<sub>90</sub>) of the population (**Fig. 1d** and **Extended Data Fig. 1**).  
 105 Each library contained over 10,000 VIM-2 variants, in which the EC<sub>50</sub> provided an estimate for the  
 106 median resistance of the population. Meanwhile, EC<sub>90</sub>/EC<sub>10</sub>, the fold difference between the  
 107 upper and lower bound of the curve's transition range, reflected the variation in the distribution

108 of resistance phenotypes within the population (**Fig. 1e**);  $EC_{90}/EC_{10}$  for a monoclonal population  
109 was typically  $<2.5$  (**Fig. 1d, Supp. Table 1**). Also, the MIC of representative VIM-2 variants was  
110 determined to monitor variation within each population. Importantly, the dose-response curve  
111 recapitulated the phenotypic characteristics of the populations, as  $EC_{50}$  and  $EC_{90}/EC_{10}$  were highly  
112 correlated to the mean and variation in MICs of isolated variants, respectively (**Fig. 1f-g**).

113 ***Neutral drift at a low antibiotic selection threshold promoted and maintained phenotypic***  
114 ***variation.***

115 We examined the evolving populations along each trajectory (AW,  $ND_{Hi}$ ,  $ND_{Lo}$ ) for three key  
116 parameters: *i*) the genetic variation, *ii*) the apparent selection pressure, and *iii*) the resulting  
117 phenotypic variation (**Fig. 2**). Over the course of the evolution, mutations were consistently  
118 accumulated, and genetic variation within the populations continuously increased, in particular  
119 during neutral drift (**Fig 2a, and Extended Data Fig. 2**). Genetic diversity of  $ND_{Lo}$  (~25% divergence  
120 from *wtVIM-2* at R100) was only moderately higher than that of  $ND_{Hi}$  (~20% at R100). We  
121 estimated the selection pressure using the ratio between the amino acid ( $N_a$ ) and nucleotide ( $N_t$ )  
122 mutations, where  $N_a/N_t = 0.46$  for a random walk accepted all nucleotide mutations (**Methods**).  
123 During AW, the  $N_a/N_t$  ratio reached as much as 0.54 in the early rounds, higher than the random  
124 walk ratio, suggesting the enrichment of adaptive and nonsynonymous mutations over  
125 synonymous mutations for higher ampicillin resistance (**Fig. 2b**). Meanwhile, throughout most of  
126  $ND_{Hi/Lo}$ ,  $N_a/N_t$  exhibited a decreasing trend, dropping and remaining below 0.46 for most of  $ND_{Hi}$   
127 and the latter half of  $ND_{Lo}$ . This indicated that both populations underwent purifying selection,  
128 whereby nonsynonymous mutations with negative effects were mostly purged to maintain the  
129 resistance phenotypes of the variants above the selection threshold (**Fig. 2b**). Nonetheless,  $ND_{Hi}$   
130 exhibited consistently lower  $N_a/N_t$ , throughout the evolution compared to that of  $ND_{Lo}$ , which  
131 confirms slightly higher selection stringency in the  $ND_{Hi}$  population.

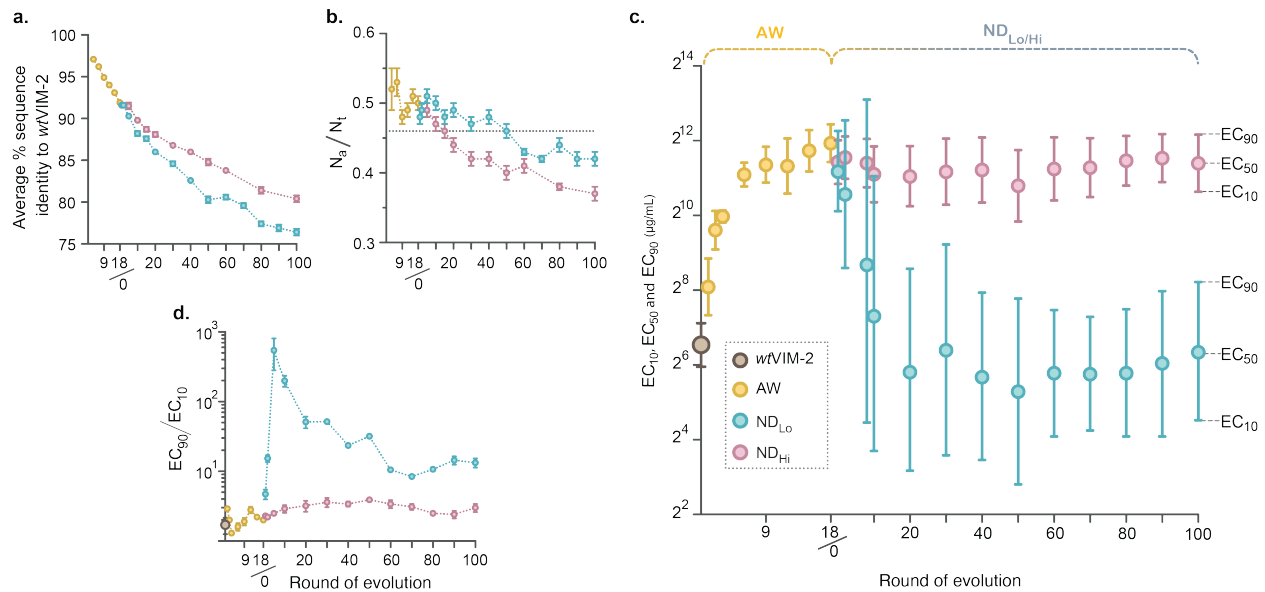

132  
 133 **Fig. 2. Phenotypic and genotypic characteristics of the AW, ND<sub>Lo</sub> and ND<sub>Hi</sub> libraries.** **a**, Changes in amino acid  
 134 sequence identity shared with wtVIM-2. **b**,  $N_a/N_t$  ratios throughout the evolving trajectories. The  $N_a/N_t$  of a random  
 135 walk (0.46) is denoted by the horizontal line (**Methods**). **c**, Changes in  $EC_{10}$ ,  $EC_{50}$  and  $EC_{90}$  of the evolved VIM-2  
 136 libraries. The central dot represents  $EC_{50}$ , and bars at both ends for  $EC_{10}$  and  $EC_{90}$  respectively. **d**, Changes in  $EC_{90}/EC_{10}$   
 137 during the evolution, error bars represent standard error between 4 biological replicates for the ND<sub>Lo</sub> populations  
 138 and 2 biological replicates for the AW and ND<sub>Hi</sub> populations. The data used for panel **a** and panel **b** are shown in  
 139 **Supplementary Table 2**; the data used for panels **c** and **d** are shown in **Supplementary Table 3**.

140 Despite the similarity observed at the genetic level, the phenotypic variation was substantially  
 141 different between trajectories (**Fig. 2c, d**). During AW,  $EC_{50}$  gradually increased by 40-fold (**Fig.**  
 142 **2c**), but the phenotypic variation, gauged by the magnitude of  $EC_{90}/EC_{10}$ , was consistently as low  
 143 as a monoclonal population, homogenous with respect to resistance levels (**Fig. 1d, Fig. 2d**). In  
 144 agreement with this, individual variants picked randomly from the AW populations exhibited  
 145 similar resistance levels (**Fig. 2d** and **Extended Data Fig. 1**). During the subsequent 100 rounds of  
 146 neutral drift, ND<sub>Hi</sub> maintained its high resistance trait ( $EC_{50} \sim 2,500 \mu\text{g/mL}$ ) and narrow phenotypic  
 147 variation ( $EC_{90}/EC_{10} < 4$ ), due to the selection against all variants that do not confer high levels of  
 148 resistance (*i.e.*,  $>1,000 \mu\text{g/mL}$ ) (**Fig. 2c-d** and **Extended Data Fig. 1**). On the contrary, the ND<sub>Lo</sub>  
 149 population exhibited a more dynamic trajectory. As expected,  $EC_{50}$  gradually decreased from  
 150  $\sim 4,000 \mu\text{g/mL}$  in the first 20 rounds to just above the purifying selection threshold ( $\sim 50 \mu\text{g/mL}$ ).  
 151 Then,  $EC_{50}$  remained at the same level in the next 80 rounds (**Fig. 2c**). Phenotypic variation of  
 152 ND<sub>Lo</sub> radically increased in the first 10 rounds ( $EC_{90}/EC_{10} > 500$  in R10), with the mixture of parental  
 153 high-resistance variants and emerging medium and low resistance variants (**Fig. 2d** and **Extended**  
 154 **Data Fig. 1**). This was anticipated as ND<sub>Lo</sub> would initially allow the accumulation of mildly negative  
 155 mutations that decrease resistance, which reflects “relaxed purifying selection”<sup>27,28</sup>. Intriguingly,  
 156 after R20, when  $EC_{50}$  became constant,  $EC_{90}/EC_{10}$  ratio only moderately decreased and remained  
 157 high at  $\sim 10$  in the next 80 rounds (**Fig 2c**). The characterization of individual variants also showed  
 158 large MIC variations in the ND<sub>Lo</sub> populations with a  $>200$ -fold difference in MIC, and some

159 variants conferring >100-fold higher MICs than the selection threshold of 10  $\mu\text{g}/\text{mL}$  (**Fig. 1c** and  
160 **Extended Data Fig. 1**). These observations suggest that high variation of antibiotic resistance  
161 levels can still be maintained in evolving populations subjected to neutral drift at a low antibiotic  
162 selection threshold.

163 ***Enhanced phenotypic variation for non-selected antibiotics.***

164 We further investigated how the genotypic variation affected phenotypes that were not directly  
165 under selection. We measured the resistance conferred by variants along each trajectory to two  
166 additional non-selected classes of  $\beta$ -lactam antibiotics: cefotaxime and meropenem (**Fig. 3** and  
167 **Extended Data Fig. 3**). The  $\text{ND}_{\text{Hi}}$  populations showed significantly higher variation in the  
168 resistance levels against ( $\sim 4$  fold) both cefotaxime and meropenem compared to ampicillin  
169 (**Extended Data Fig. 4g**). The phenotypic variation observed for resistance for non-selected  
170 antibiotics in the  $\text{ND}_{\text{Lo}}$  populations was similar to the variation for ampicillin in  $\text{ND}_{\text{Lo}}$  but much  
171 higher than variation in  $\text{ND}_{\text{Hi}}$  (**Extended Data Fig. 4h**). Interestingly at the level of individual  
172 variants, the cefotaxime and meropenem resistance deviated from that of ampicillin and  
173 between each other to some extent (**Fig. 3a-d**, and **Extended Data Fig. 4a-f**). This uncoupling of  
174 mutational effects on three antibiotics generated further phenotypic variation within the  
175 populations, *e.g.*, the substrate specificity between ampicillin and cefotaxime resistance varies  
176 >1,000-fold among variants within the same population (**Fig. 3d**). Thus, neutral drift expands  
177 phenotypic diversity and evolvability of the antibiotic resistance gene population beyond the

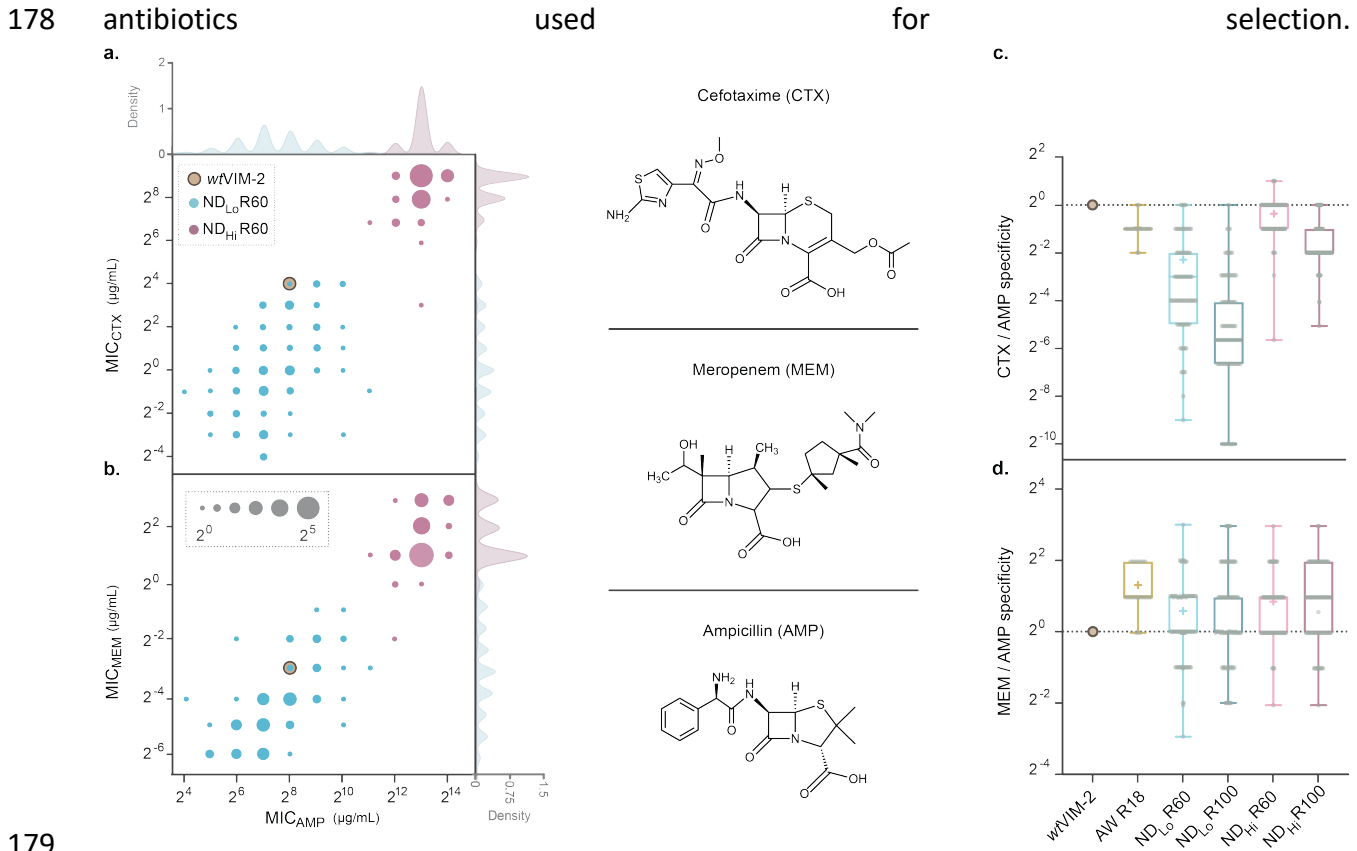

180 **Fig. 3. The distribution of resistance against selected and non-selected antibiotics.** **Fig. 3. The distribution of**  
 181 **resistance against selected and non-selected antibiotics.** **a, b.** The correlation between resistances between  
 182 selected antibiotics (ampicillin,  $MIC_{AMP}$ ) and non-selected antibiotics (cefotaxime,  $MIC_{CTX}$  and meropenem,  $MIC_{MEM}$ )  
 183 of 92 variants from the R60  $ND_{Lo}$  and  $ND_{Hi}$  populations. The resistance level was measured as MIC in the agar plate  
 184 assays. The radii of the circles are weighted by the number of variants with the same substrate specificity. The  
 185 Gaussian kernel density distribution of variants that have a certain AMP, CTX and MEM MIC is shown on the top and  
 186 right axes in lighter grey (bandwidth=0.02). *wtVIM-2*'s resistance profile was indicated with a tan circle with dark  
 187 brown edges. Chemical structures of the  $\beta$ -lactam antibiotics used in characterizing the resistance phenotype of  
 188 VIM-2 variants is given to the right. **c, d.** The distribution of the relative substrate specificity, the resistance level  
 189 against non-selected antibiotics: CTX (**c**), and MEM (**d**) over selected antibiotics, AMP, normalized over the same  
 190 ratio for *wtVIM-2* (shown as dashed lines, refer to **Methods** for the formula). The correlation between  $MIC_{AMP}$ ,  
 191  $MIC_{CTX}$ , and  $MIC_{MEM}$  for the R60 populations and the comparison of fold-differences between  $MIC_{AMP}$ ,  $MIC_{CTX}$ , and  
 192  $MIC_{MEM}$  for the evolved enzyme populations are shown in **Extended Data Fig. 4**.

193 **Phenotypic variation in  $ND_{Lo}$  was not caused by sub-MIC selection or evolutionary hysteresis.**

194 We then investigated the mechanism underlying the emergence and maintenance of the  
 195 observed phenotypic variation in the  $ND_{Lo}$  populations. To this end, we hypothesized several  
 196 potential mechanisms, and examined their likelihood. The first possibility was that a low  
 197 ampicillin concentration provides some selective advantage to high-resistance variants over  
 198 lower-resistance variants *i.e.*, sub-MIC selection<sup>29,30</sup>. However, our previous work on deep  
 199 mutational scanning (DMS) of *wtVIM-2* indicated otherwise<sup>25,26</sup>. The relationship between  $EC_{50}$



200 and fitness of >5,000 VIM variants can be described as a single sigmoid function with a steep  
201 slope, with no apparent advantage for high-resistant variants above the selection threshold<sup>25,26</sup>.  
202 Supporting this, when ND<sub>Lo</sub> R60 and R100 populations were subjected to five cycles of selection  
203 under 10 µg/mL ampicillin (P10) without mutagenesis, the phenotypic variation remained the  
204 same (**Extended Data Fig. 5a**), confirming that sub-MIC selection was not critical for the  
205 phenotypic variation observed in the ND<sub>Lo</sub> populations (**Extended Data Fig. 5b-c**). We also tested  
206 if there was a fitness cost for high-resistance variants, via an extended transformation  
207 experiment in the absence of ampicillin (P0) (**Extended Data Fig. 5a**). The phenotypic variation  
208 was also unchanged over five rounds of transformations, confirming that there was no significant  
209 difference in the fitness cost among the variants within the selected populations (**Extended Data**  
210 **Fig. 5d**).

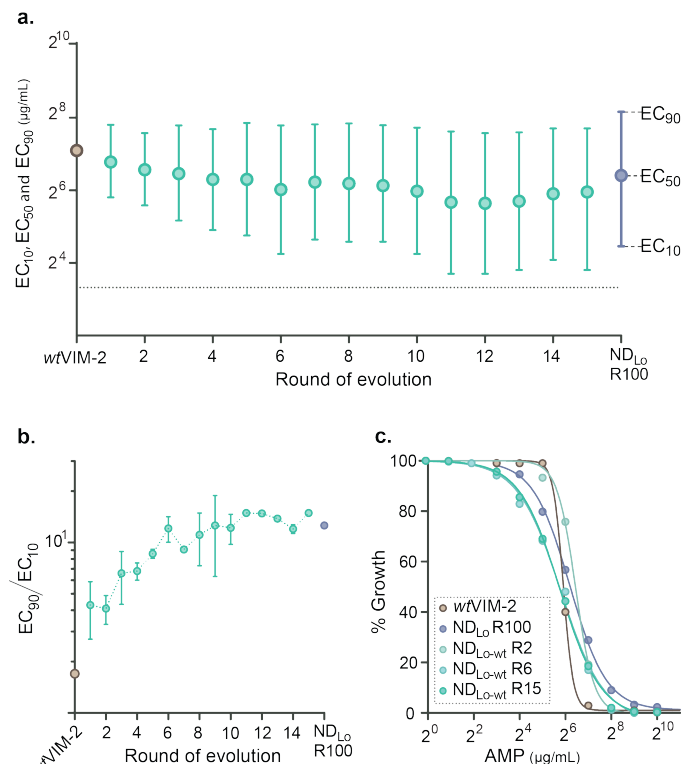

211

212 **Fig. 4. Phenotypic characterization of the ND<sub>Lo</sub>-wt libraries.** **a**, Changes in the ampicillin EC<sub>10</sub>, EC<sub>50</sub> and EC<sub>90</sub> of ND<sub>Lo</sub>-wt  
213 over the experimental evolution. The central dot represents EC<sub>50</sub>, and bars at both ends for EC<sub>10</sub> and EC<sub>90</sub>  
214 respectively. **b**, Changes in EC<sub>90</sub>/EC<sub>10</sub> during the evolution, error bars represent standard error between 2-4 biological  
215 replicates each ND<sub>Lo</sub>-wt population. **c**, Ampicillin dose-response curves of select ND<sub>Lo</sub>-wt libraries compared to ND<sub>Lo</sub>  
216 and wtVIM-2. The data of **b** and **c** is shown in **Supplementary Table 4**.

217 The second hypothesis we tested was “evolutionary hysteresis”, whereby the historical changes  
218 in the selection pressure that the VIM-2 populations experienced might cause high-resistance  
219 variants to remain in the populations. Specifically, wtVIM-2 was initially evolved to its maximum  
220 resistance via AW, and subsequently subjected to neutral drift, and thus, some variants could  
221 have retained high resistance by accumulating only neutral mutations. However, the phenotypic

222 variation was maintained over 80 rounds of neutral drift (over 60 amino acid mutations per  
223 variant on average). Thus, it is unlikely for variants to exclusively obtain neutral mutations and  
224 retain high resistance for so long when the selection pressure does not require it. Also, the  
225 phylogenetic analysis of variants showed scattered lineages of high-resistance variants across the  
226 ND<sub>Lo</sub> phylogenetic tree as opposed to clustering of high resistance variants, suggesting that high-  
227 resistance variants emerged from low-resistance subpopulations during the neutral drift rather  
228 than being carried forward from high resistance ancestral variants (**Extended Data Fig. 6**).

229 Furthermore, to examine whether neutral drift is truly sufficient to promote phenotypic  
230 variation, we performed an additional line of ND experiment with 10 µg/mL ampicillin starting  
231 from *wtVIM-2* (ND<sub>Lo-wt</sub>) (**Fig. 4a**). Importantly, *wtVIM-2* exhibits an EC<sub>50</sub> (100 µg/mL); 10-fold  
232 above the concentration used for the selection, and confers complete resistance to *E. coli* at 10  
233 µg/mL. After only several rounds of neutral drift, ND<sub>Lo-wt</sub> exhibited comparably high phenotypic  
234 variation to the ND<sub>Lo</sub> populations (**Fig. 4a-c**). Peculiarly, ND<sub>Lo-wt</sub> contained higher resistance  
235 variants (EC<sub>50</sub>>500 µg/mL) than *wtVIM-2*, suggesting high-resistance variants emerged during  
236 neutral drift without an adaptive selective force for high antibiotic concentrations  
237 (**Supplementary Table 6**). These observations confirmed that evolutionary hysteresis is not the  
238 cause for high phenotypic variation in ND<sub>Lo</sub>. On the contrary, these suggest that neutral drift with  
239 a low antibiotic concentration is sufficient to both maintain and generate high phenotypic  
240 variation, including higher resistance variants.

#### 241 ***Neutral drift with threshold selection is the mechanistic basis for high phenotypic variation.***

242 Finally, we sought to determine how the intrinsic dynamics in neutral drift itself can explain  
243 observed high phenotypic variation. To this end, we developed a model which simulates the  
244 evolution of an antibiotic resistance gene, and evaluated how the evolution shapes phenotypic  
245 variation in a static environment (**Fig. 5**). Dynamics in neutral drift can be recapitulated as  
246 mutation-selection balance, in which the influx of different types of mutations (*e.g.*, beneficial,  
247 neutral, deleterious mutations) is constantly shaped by selection to reach an equilibrium state<sup>31–</sup>  
248 <sup>33</sup>. In this equilibrium, phenotypic variation can arise when variants with different antibiotic  
249 resistance levels exhibit similar fitness levels and selectively neutral. A key attribute of our model  
250 compared to previous studies of mutation-selection balance is the threshold-like relationship  
251 between fitness and phenotype, where a selectively neutral zone exists above the selection  
252 threshold. Therefore, while previous models explored mutational effects directly on organismal  
253 fitness and resulting genetic diversity, we first consider mutations as effects on the protein  
254 phenotype at the molecular level, *i.e.*, mutations may increase and decrease the resistance levels,  
255 and then evaluate the effect of phenotypic changes on the organismal fitness at a given antibiotic  
256 selection pressure. This allows for a more realistic model of protein evolution based on  
257 biochemical principles. We calculate the fitness of each variant using **equation (1)**:

$$Fitness \sim g = \frac{g_0}{1 + (0.5) \left( \frac{[C]}{EC_{50}} \right)^n} \quad (1)$$

258 where  $g_0$  denotes the growth rate in the absence of ampicillin and  $n$  represents the Hill  
259 coefficient,  $[C]$  is the concentration of the antibiotic,  $EC_{50}$ , the resistance level of the variant. The  
260 threshold-like fitness-phenotype relationship has been observed before in many proteins  
261 including *wtVIM-2* (**Extended Data Fig. 7a**)<sup>18,25,26</sup>. In our model, the influx of mutations and  
262 variants within the population is constantly shaped by selection; variants can be selected and  
263 purged at rates proportional to their selection coefficients [**equation (2)**], where  $F$  is fitness and  $s$   
264 is the selection coefficient of the variant over *wtVIM-2*]:

$$s = \frac{F_{mut} - F_{WT}}{F_{WT}} = \frac{\frac{1}{1 + (0.5) \left( \frac{[C]}{EC_{50_{mut}}} \right)^n} - \frac{1}{1 + (0.5) \left( \frac{[C]}{EC_{50_{WT}}} \right)^n}}{\frac{1}{1 + (0.5) \left( \frac{[C]}{EC_{50_{WT}}} \right)^n}} \quad (2)$$

265 As mutations accumulate, variants with lower resistance levels than the antibiotic threshold will  
266 be purged, and variants retaining resistance above the threshold will survive. Importantly, a  
267 threshold relationship between fitness and resistance implies that there is a fitness plateau<sup>26</sup>,  
268 which comprises a selectively neutral zone for a range of resistance; variants with much higher  
269 resistance than the threshold would exhibit the same fitness level as variants with marginal  
270 resistance (**Extended Data Fig. 7a**).

271

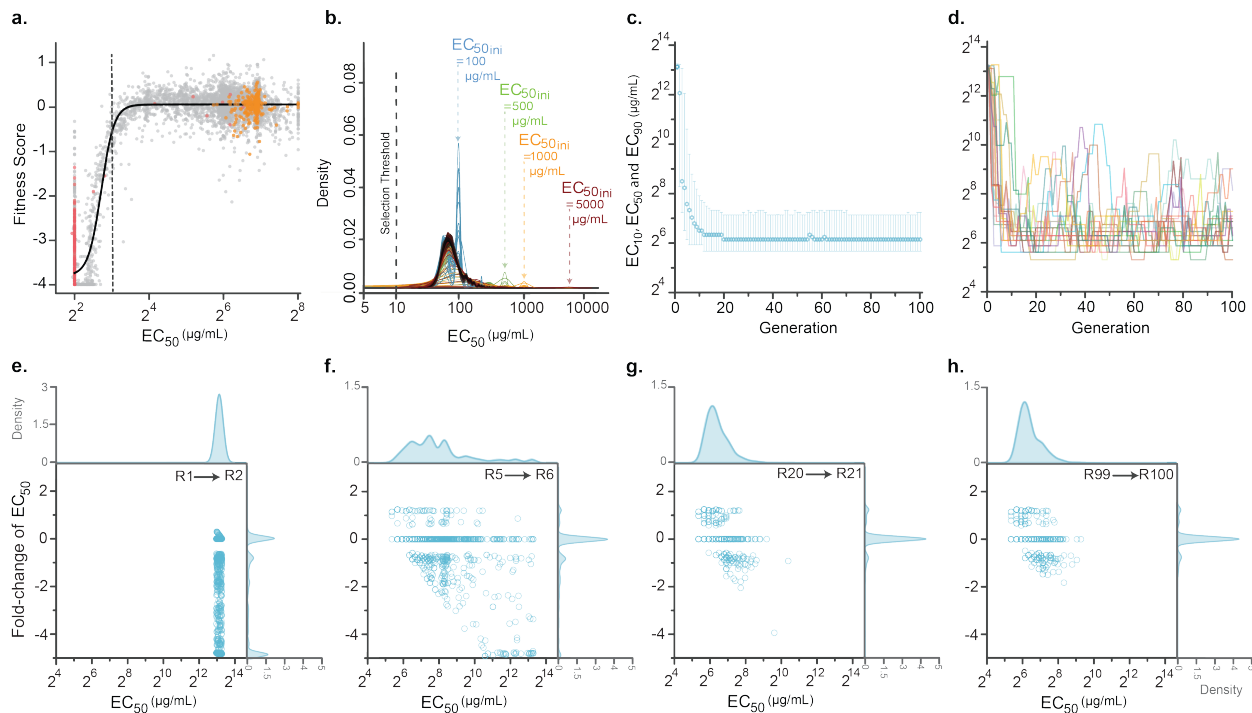

272

273 **Fig. 5. DME of wtVIM-2 and simulation of the ND<sub>Lo</sub> trajectory**  
 274 **a**, Resistance phenotype–fitness landscape of wtVIM-  
 275 2 DMS library in the presence of AMP. Nonsense mutations are annotated in red, synonymous in orange and  
 276 missense mutations in grey. The solid black curve indicates the line of best fit for a sigmoidal curve fit (equation (1)),  
 277 while the black vertical dashed line indicates the AMP concentration used during selection (8µg/mL). Adapted from  
 278 *Chen et al., 2021*<sup>26</sup>. **b**, Convergence of the resistance level of the ND<sub>Lo</sub> populations starting from different initial  
 279 conditions. The density of the ampicillin resistance level of the VIM-2 populations evolving under the ND<sub>Lo</sub> regime is  
 280 plotted as they evolve to the equilibrium state where different types of mutations are at balance. The trajectories  
 281 for simulated evolution were started from variants with the initial EC<sub>50</sub>=100 µg/ml (blue, reflects the experimental  
 282 ND<sub>Lo</sub>-wt trajectory), 500 µg/ml (green), 1,000 µg/ml (orange), and 5,000 µg/ml (red, reflects the experimental ND<sub>Lo</sub>  
 283 trajectory). These initial populations converged to a final distribution of resistance levels shown in black. Simulation  
 284 data can be found in **Supplementary Data 5**. **c**, Ampicillin EC<sub>10</sub>, EC<sub>50</sub> and EC<sub>90</sub> (µg/mL) of variants evolving under the  
 285 ND<sub>Lo</sub> regime across 100 rounds of simulated evolution, with an effective population size ( $N_{eff}$ ) of  $10^4$ . The selection  
 286 threshold is indicated with the grey dotted line. **d**, Ampicillin EC<sub>50</sub> values of 20 randomly picked variants from the  
 287 simulated ND<sub>Lo</sub> trajectory across 100 rounds (or generations) of evolution. **e**, Scatter plot of the distribution of  
 288 mutational effects on the ampicillin EC<sub>50</sub> of variants evolving under the simulated ND<sub>Lo</sub> regime, compared to the  
 289 ampicillin EC<sub>50</sub> of the  $10^3$  variants before acquiring the mutation. The mutational effects on resistance level are  
 290 shown for the simulated variants from R1, R5, R20, and R99, as they move onto R2, R6, R21 and R100, respectively  
 291 (the same data for additional rounds is given in **Extended Data Fig. 9**). Data and calculations for panels **c**, **d** can be  
 found in **Supplementary Data 6**.

292 In order to conduct the most realistic simulations, we used the key parameters for the model  
 293 using equation 1;  $n$  and  $[C]$  were empirically obtained from a global fitness-phenotype-  
 294 environment landscape in our previous DMS study of VIM-2 (**Extended Data Fig. 7a** and  
 295 **Methods**)<sup>25,26</sup>. We also utilized the experimentally obtained distribution of mutational effect  
 296 (DME) on the level of antibiotic resistance (EC<sub>50</sub>) of wtVIM-2. The DME of wtVIM-2 represents  
 297 largely 2% positive, 35% neutral and 63% negative mutations in terms of EC<sub>50</sub> (**Extended Data**

298 **Fig. 7b).**<sup>25</sup> We performed the simulations with a population size of  $10^4$ , beginning from various  
299  $EC_{50}$  starting points. At each round, the population experienced an influx of random mutations  
300 based on the DME with a rate of one mutation per variant per generation. A variant was  
301 propagated in the next cycle if it satisfied the probability of fixation using the equation described  
302 in **Methods**. We used a fixed distribution of DME in terms of fold change in  $EC_{50}$  during the  
303 simulations. The simulations strongly corroborated the characteristic features of the  $ND_{Lo}$   
304 populations *i.e.*, the populations reach identical and high phenotypic variation regardless of the  
305 resistance phenotype of the starting populations (**Fig. 5b**).

306 Next, we tracked mutational dynamics and their effects on fitness and  $EC_{50}$  during the simulations  
307 and identified several consequences for the equilibrium state in the distribution of phenotype  
308 (**Fig. 5b-h**, and **Extended Data Fig. 8**). When the starting population exhibits much higher  
309 resistance to the threshold, the population will accumulate more negative mutations, and  
310 consequently, the average resistance will decrease (**Fig. 5c-f**, **Extended Data Fig. 8a**, and  
311 **Extended Data Fig. 9**). However, as the average resistance approaches the threshold, fixation  
312 mainly occurs among positive, neutral, and mildly negative mutations while highly negative  
313 mutations are consistently purged out (**Fig 5c, f-h**, **Extended Data Fig. 8a**, and **Extended Data Fig.**  
314 **9**). At mutation-selection balance, ~10% of fixated mutations that changed the  $EC_{50}$  significantly,  
315 did so by increasing  $EC_{50}$  more than two-fold (**Fig. 5g-h**, and **Extended Data Fig. 9**) At this dynamic  
316 stage, high-resistance variants can sporadically emerge in the neutral zone without a substantial  
317 selective advantage and by stochastically acquiring positive mutations (**Fig. 5d-h**, and **Extended**  
318 **Data Fig. 9**). Such high-resistance variants can further accumulate mildly negative mutations  
319 which reduce their resistance levels. The sporadic emergence and disappearance of high-  
320 resistance variants create an equilibrium, resulting in observed phenotypic diversity.

321 We further found that the fraction of positive mutations in the DME establishes an upper bound  
322 to the resistance level of the population (**Extended Data Fig. 10**). Our simulations with low or no  
323 fraction of positive mutations in DME resulted in low phenotypic variation with steep declines in  
324 high-resistance variants, and mutation-selection balance work to largely eliminate negative  
325 mutations, while still accumulating neutral mutations. This is likely the case in the  $ND_{Hi}$   
326 populations, as the population was drifting with an extremely high selection threshold for  
327 antibiotic resistance that exhausted the pool of positive mutations. Taken together, our results  
328 show that populations that evolve under mutation-selection balance and on a threshold-like  
329 fitness landscape can generate and maintain the phenotypic variation. The level of such variation  
330 for a given population size is dictated by the DME and the shape of the phenotype-fitness  
331 relationship (**Extended Data Fig. 7**).

332 **Discussion**

333 Using experimental evolution, we demonstrate that variation in phenotype (antibiotic resistance  
334 level) of VIM-2  $\beta$ -lactamase can be simply promoted through neutral drift, *i.e.*, evolution in a  
335 static environment. Our observations provide important implications for understanding and  
336 predicting the evolution of antibiotic and drug-resistance genes in the environment and  
337 clinics<sup>30,34</sup>. Our results suggest that the emergence of high antibiotic resistance pathogens can be  
338 promoted even in the presence of trace amounts of antibiotics, such as concentrations observed  
339 in the environment due to global anthropogenic antibiotic contaminations<sup>35–37</sup>. Such “hidden”  
340 high-resistance variants within the population can serve as a springboard to readily adapt when  
341 the concentration of antibiotics is increased, *e.g.*, applying antibiotics to patients, animals, and  
342 environments. Moreover, as the ND<sub>Lo</sub> populations exhibited variable and higher substrate  
343 specificity against non-selected  $\beta$ -lactams, the population can encompass further evolvability  
344 against other antibiotics as well. Further understanding such evolutionary dynamics in natural  
345 environments would be critical for combatting the emergence and dissemination of multidrug-  
346 resistant pathogens.

347 More generally, our findings provide a new and robust mechanistic explanation for the universal  
348 existence of phenotypic variation and adaptive capacity within evolving populations. Our  
349 observations explain how phenotypic variation of a trait which is directly under selection  
350 pressure can be generated and maintained through evolution in a static environment. Indeed,  
351 many natural proteins evolve via neutral drift, *i.e.*, under purifying selection pressure to maintain  
352 their function above a certain threshold<sup>38</sup>. Also, the threshold-like relationship between the traits  
353 of protein (function and stability) and fitness is commonly described and even considered as a  
354 universal attribute<sup>17,39–42</sup>. Furthermore, many experiments showed the existence of a  
355 considerable fraction of positive mutations to enhance protein function and stability<sup>18,25,26,43,44</sup>,  
356 indicating that the selection thresholds for many proteins in nature may be modest and more  
357 similar to the ND<sub>Lo</sub> compared to ND<sub>Hi</sub><sup>45,46</sup>. In consequence, many, if not most, biological molecules  
358 (and by extent, organisms) will inevitably exhibit phenotypic variation within a population and  
359 species. Importantly, the mechanism we found in this study are not incompatible with previously  
360 described mechanisms for phenotypic variation such as differential selection and environmental  
361 perturbations, as these mechanisms simply add more phenotypic variation in the population.  
362 Moreover, variants with much higher functional levels than the selection threshold can emerge  
363 and be maintained during neutral drift in a simple and static environment without being selected  
364 for. Thus, neutral drift under threshold selection plays a key role in facilitating the evolutionary  
365 capacity to adapt to environmental perturbations.

366 **Acknowledgments:**

367 We thank members of the Tokuriki lab for the discussions and comments.

368 **Funding:**

369 We thank the Canadian Institute of Health Research (CIHR) Project Grants (AWD-019305 and  
370 AWD-018386) for the financial support.

371 **Author contributions:**

372 Conceptualization: NT, ANE, PD, RDS, AWRS

373 Methodology: NT, ANE, PD, RDS, LK, RJ, BEL

374 Investigation: NT, ANE, PD, RDS, JZC, AWRS

375 Visualization: ANE, PD, JZC

376 Funding acquisition: NT

377 Project administration: ANE, RDS, LK, RJ, BEL

378 Supervision: NT, RDS, PD, AWRS, JZC

379 Writing – original draft: ANE, NT, PD, RDS

380 Writing – review & editing: ANE, NT, PD, RDS, JZC, AWRS

381 **Conflict of Interest:**

382 Authors declare no competing interests.

383 **Data Availability:**

384 All experimental data can be provided upon request from the corresponding author.

385 Description of supplementary data file contents are given below.

386 **Supplementary Data 1:** Adaptive walk ampicillin selection regime and number of surviving  
387 variants after selection.

388 **Supplementary Data 2:** Genotypic analysis of individual variants from the AW, ND<sub>Lo</sub>, ND<sub>Hi</sub> and  
389 ND<sub>Lo-wt</sub> libraries and their  $\beta$ -lactam antibiotic MIC.\*

390 **Supplementary Data 3:**  $\beta$ -lactam MIC values of variants from the AW, ND<sub>Lo</sub>, ND<sub>Hi</sub> libraries and  
391 analyses.

392 **Supplementary Data 4:** Ampicillin dose-response curve data of AW, ND<sub>Lo</sub>, ND<sub>Hi</sub>, ND<sub>Lo-wt</sub>, P0-ND<sub>Lo</sub>,  
393 R100, P10-ND<sub>Lo</sub>,-R100, and P10-ND<sub>Lo</sub>,-R60 libraries.

394 **Supplementary Data 5:** Raw ampicillin EC<sub>50</sub> values of 100 variants from simulated ND<sub>Lo</sub>  
395 evolutionary trajectory with different starting ampicillin EC<sub>50</sub> values across 100 generations.

396 **Supplementary Data 6:** Raw ampicillin EC<sub>50</sub> and fitness values of 100 variants from simulated  
397 ND<sub>Lo</sub> evolutionary trajectory across 100 generations.

398 **Supplementary Data 7:** Relative fraction of mutations that affect enzyme phenotype (*ie.*  
399 ampicillin EC<sub>50</sub>; positive, negative and neutral) and the fitness of variants from simulated ND<sub>Lo</sub>  
400 evolutionary trajectory across 100 generations per generation.

401 **Supplementary Data 8:** Fasta files of the DNA sequences of the cloning plasmid pIDR with *wtVIM-*  
402 *2* gene inserted into the cloning region of the randomly-picked mutant VIM-2 variants.

403 \*The MIC values are not present for all  $\beta$ -lactams used here for screening (meropenem,  
404 cefotaxime, ampicillin) for all mutant VIM-2 variants.

#### 405 **Statistical Analysis and Code Availability:**

406 We used R (v4.2) within Jupyter Notebook (v6.5.2) for all statistical analyses of the simulations.  
407 In particular, we plotted the density of EC<sub>50</sub> values in Figure 5b using the kernel density function  
408 in R. The code to simulate the evolution of ND<sub>Lo</sub> is available at the GitHub repository:  
409 [https://github.com/dasmeh/Neutral\\_Zone/](https://github.com/dasmeh/Neutral_Zone/).

#### 410 **Materials and Methods**

##### 411 **Construction of VIM-2 libraries for the AW and ND<sub>Hi/Lo/Lo-wt</sub> trajectories.**

412 The wild-type (wt) VIM-2 gene including its signal peptide sequence was synthesized (Bio Basic  
413 Inc.) and subcloned into a low-copy number plasmid, pIDR2, under a constitutive TEM-1 derived  
414 promoter and a chloramphenicol resistance marker (*cat*), using NcoI and XhoI restriction enzyme  
415 sites. For the AW trajectory, randomly mutagenized libraries of wt VIM-2 were created by error-  
416 prone PCR with the nucleotide analogues, 8-oxo-2'-deoxyguanosine-5'-triphosphate (8-oxo-  
417 dGTP) and 2'-deoxy-P-nucleoside-5'-triphosphate (dPTP) (TriLink). For each library, two  
418 independent PCRs with 8-oxo-dGP and dPTP were performed to ensure a balance between  
419 transition versus transversion type nucleotide mutations and a specific mutation rate. Each 25  $\mu$ L  
420 PCR consisted of 1 x GoTaq Buffer (Promega), 3  $\mu$ M MgCl<sub>2</sub>, 0.1  $\mu$ M of each primer, 0.2 mM of  
421 dNTPs, 1.00 U of GoTaq DNA polymerase (Promega), 1 ng of template plasmid, and either 100  
422  $\mu$ M of 8-oxo-dGTP or 1  $\mu$ M of dPTP. The first PCR was programmed as follows: an initial



423 denaturation (95°C for 2 minutes), followed by 20 cycles of 95°C for 30 seconds, 58°C for 60  
424 seconds, 72°C for 60 seconds, before a final extension step (72°C for 3 minutes). The PCR products  
425 were then subsequently purified with the EZ.N.A.<sup>®</sup> Cycle Pure PCR Purification Kit (OMEGA Bio-  
426 tek Inc), quantified, mixed and used as a template for the second PCR. Each 50 µL amplification  
427 PCR consisted of 1 x GoTaq Buffer (Promega), 3 µM MgCl<sub>2</sub>, 0.1 µM of each primer, 0.25 mM of  
428 dNTPs, 1.0 U of GoTaq DNA polymerase (Promega), and 5 ng of each PCR product from the two  
429 previous reactions. The reaction was run as the first PCR but with 35 cycles. The PCR products  
430 were purified with the EZNA Cycle Pure PCR Purification Kit, digested with NcoI (FastDigest,  
431 ThermoFisher Scientific™) and XhoI (FastDigest, ThermoFisher Scientific™) for the AW and ND<sub>Lo</sub>  
432 and ND<sub>Hi</sub> libraries and NcoI and KpnI (FastDigest, ThermoFisher Scientific™) for ND<sub>Lo</sub>-wt libraries  
433 for a 1 hr at 37°C. The pIDR plasmid was also digested by NcoI and XhoI, or NcoI and KpnI for 3  
434 hours at 37°C. The digested plasmid was subsequently purified from 1% agarose gel using gel  
435 purification columns, the digested PCR products were purified with the E.Z.N.A.<sup>®</sup> Cycle Pure PCR  
436 Purification Kit. The ligation mixture (10 µL) consisted of 1 × T4 DNA ligase buffer (ThermoFisher  
437 Scientific™), 5 U of T4 DNA ligase (ThermoFisher Scientific™), 10-8 ng of prepared vector, and 30-  
438 40 ng of prepared mutagenized insert, was incubated at room temperature for 1 hour. The  
439 ligations were then purified with a MicroElute kit (OMEGA Bio-tek Inc.) and eluted with 20 µL of  
440 water.

#### 441 ***Selection of the libraries in the presence ampicillin.***

442 To create the AW and ND<sub>Hi/Lo/Lo-wt</sub> libraries, 4-5 µL of the purified ligation mixtures were  
443 transformed to *E.cloni*<sup>®</sup> 10G *E. coli* cells (Lucigen Corp.) using electroporation. For the AW  
444 trajectory, the transformants were grown overnight at 30°C in 10 mL of LB media supplemented  
445 with 34 µg/mL of chloramphenicol. Then, 100 µL of a 1:100 dilution of the overnight culture was  
446 plated onto a series of LB agar plates containing 2-fold increases in the concentration of ampicillin  
447 from 2 to 8192 µg/mL. The plate with the highest concentration of ampicillin with colony counts  
448 between 100 and 1,000 colonies was collected (**Supplementary Data 1**). The plasmids were  
449 extracted from the colonies and used as the template for the next round. For the ND<sub>Hi/Lo/Lo-wt</sub>  
450 trajectories, the transformants were plated onto large LB agar plates containing 34 µg/mL of  
451 chloramphenicol in addition to 1,000 µg/mL of ampicillin for the ND<sub>Hi</sub> libraries, and 10 µg/mL of  
452 ampicillin for the ND<sub>Lo/Lo-wt</sub> libraries.

#### 453 ***Antibiotic dose-response curves to calculate EC<sub>50</sub> and EC<sub>90</sub>/EC<sub>10</sub>.***

454 To assess the average resistance level (EC<sub>50</sub>; or effective concentration that inhibits the growth  
455 of 50% of the population) and the diversity of the resistance levels (approximated by the ratio of  
456 EC<sub>90</sub>/EC<sub>10</sub>) present within each population, antibiotic dose-response curves were obtained using  
457 cell culture assays using 96-well plates. First, glycerol stocks of *E.cloni*<sup>®</sup> 10G *E. coli* cells harboring

458 single libraries were inoculated in 3 mL LB media supplemented with 34 µg/mL chloramphenicol  
459 (LB-Cm) for 16 hours at 30°C. The OD<sub>600</sub> value of these cultures was calculated, and diluted to  
460 have an OD<sub>600</sub> value of 0.0015 in a 10 mL day culture. The cultures were then grown for 1 hour  
461 20 minutes at 30°C, or until the OD<sub>600</sub> of cultures reached 0.01-0.02. 180 µL of the day cultures  
462 were mixed with 20 µL LB-Cm either containing no additional antibiotics or supplemented with  
463 11 different concentrations of antibiotic with 2-fold increments of  
464 ampicillin/cefotaxime/meropenem, in 96-well assay plates (ThermoFisherScientific™ CORNING).  
465 The cultures were grown for 6 hours at 37°C, and OD<sub>600</sub> of the cultures were measured. The  
466 'percent survivals' of each library at each β-lactam antibiotic concentration was calculated  
467 comparing OD<sub>600</sub> value of *E. coli* cultures in the absence and presence of antibiotics in the culture.  
468 The values were then fit onto a Hill equation (1) with a top constraint of 100 using the PRISM™  
469 9.0 software.

$$470 \quad \% \text{ growth} = \text{bottom} + \frac{\text{top} - \text{bottom}}{1 + \left( \frac{\text{EC}_{50}}{\text{drug concentration}} \right)^{\text{Hill Coefficient}}} \quad (1)$$

471 The EC<sub>50</sub>, EC<sub>90</sub> and EC<sub>10</sub> values of the curve were extracted to calculate EC<sub>50</sub> and EC<sub>90</sub>/EC<sub>10</sub>. Each  
472 assay was carried out with two technical replicates (two independent culture in the same 96 well  
473 plate), and at least 2 biological replicates (the same experiment on different days) were carried  
474 out for each library.

#### 475 **Measuring the minimum inhibitory concentration of individual variants.**

476 To quantify the ampicillin resistance level conferred by individual variants from VIM-2 libraries  
477 to *E. coli*, we used agar-plate based assays to determine the minimum inhibitory concentration  
478 (MIC) of antibiotics to *E. coli* carrying a VIM-2 variant. *E. coli* cells harboring a single VIM-2 variant  
479 were grown in 500 µL LB-Cm at 30°C overnight in a deep-96-well plate. The next day, 5 µL of the  
480 overnight culture was inoculated into 195 µL of LB-Cm in quadruplicate in a standard 96-well  
481 plate and grown for 3 hours at 37°C. The cultures were then plated with 96-well replicator pins  
482 on a series of 15 mm LB agar plates with increasing levels of antibiotics (two-fold increases in  
483 ampicillin, meropenem, and cefotaxime from, 2 to 32,768 µg/mL, 0.016 to 64 µg/mL, and mL  
484 0.032 to 4096 µg/mL respectively). The agar plates were subsequently incubated overnight at  
485 37°C. The next day, the MIC was determined by identifying the concentration of antibiotics by  
486 which no growth was observed in at least three of the four replicates for each variant. Descriptive  
487 Statistics on the data was conducted on PRISM 9.0. The specificity coefficients were calculated  
488 using the following formula:

$$489 \quad \text{Specificity Coefficient} = \frac{\frac{\text{Non - selected MIC}_{var}}{\text{AMP MIC}_{var}}}{\frac{\text{Non - selected MIC}_{wt VIM-2}}{\text{AMP MIC}_{wt VIM-2}}}$$

490

491 ***Sequencing of individual variants.***

492 24-96 single colonies were randomly picked from selected libraries, and the VIM-2 gene region  
493 of the plasmid was PCR amplified using NEB Taq2x Master Mix using the manufacturer's protocol,  
494 with an initial denaturation (95°C for 2 minutes), followed by 30 cycles of denaturation (95°C for  
495 30 seconds, 58°C for 60 seconds and 72°C for 60 seconds), before a final extension step (72°C for  
496 3 minutes). The PCR products were then purified enzymatically by treatment with Exol  
497 (ThermoFisherScientific™) and FastAP (ThermoFisherScientific™) for 1 hour at 37°C, and then the  
498 enzymes were inactivated via heat treatment of the sample by incubation at 85°C for 15 minutes.  
499 The purified products were sent for Sanger sequencing (Azenta™). The sequence results were  
500 visually inspected in Geneious® bioinformatics software and the mutations were identified by  
501 comparing each mutant VIM-2 gene sequence to the *wtVIM-2* gene sequence. The identified  
502 amino acid and nucleotide mutations were used to calculate the percent identity each variant  
503 shared with *wtVIM-2* to determine divergence from the *wtVIM-2* sequence, and the percent  
504 identity shared by each variant with other variants from the same library, to calculate within  
505 library diversity. Any insertion or deletion variants were brought to the same length as *wtVIM-2*  
506 by adding 'X' in place of the deleted residues (deletion only occurred at the last 5-10 amino acid  
507 residues), and removing any insertion mutations at the 3' end of the gene due to the mutations  
508 randomly introduced to the stop codon.

509 ***Calculation of random walk threshold for  $N_a/N_t$ .***

510 To estimate the expected  $N_a/N_t$  ratio from a completely random accumulation of mutations (i.e.,  
511 all mutations are tolerated), we first calculated the  $N_a/N_t$  ratio for each codon when mutated to  
512 all other codons.  $N_a = 1$  if the codons encode different amino acids, else  $N_a = 0$ .  $N_t$  is simply the  
513 number of nucleotide differences between codons, regardless of the exact base. We then take  
514 the average  $N_a/N_t$  of all possible mutations for each codon to get the random walk  $N_a/N_t$  for a  
515 given codon. To estimate the  $N_a/N_t$  for a drifting sequence starting from *wtVIM-2*, we calculate  
516 an average of all random walk  $N_a/N_t$  ratios for the codons, weighted by the frequency of each  
517 codon in the *wtVIM-2* sequence, arriving at a final value of 0.46.

518 ***Phylogenetic tree construction.***

519 656 individual sequences of randomly picked variants from the AW, ND<sub>Lo</sub>, and ND<sub>Hi</sub> libraries were  
520 subjected to multiple sequence alignment (MSA) using ClustalW. The MSA was used to construct  
521 a phylogenetic tree using IQ-TREE Multicore Version 2.12 COVID-edition (March 30<sup>th</sup> 2021) and  
522 with an 'ultrafast\_bootstrap' bootstrap replicate number of 5,000. The tree was visualized and  
523 annotated using the ITOL™ tool.

524 **Population genetic simulations to capture evolutionary dynamics in the trajectories.**

525 The distribution of mutational effects (DMEs) of wtVIM-2 for ampicillin resistance ( $EC_{50}$ ) was  
526 experimentally obtained in our previous deep mutational scanning (DMS) study of VIM-2 (**Supp.**  
527 **Fig. 1**)<sup>25,26</sup>. We also obtained the relationship between  $EC_{50}$  and the fitness of *E. coli* harbouring  
528 VIM-2 variants.

$$529 \text{ Fitness} \sim g = \frac{g_0}{1 + (0.5) \left( \frac{[C]}{EC_{50}} \right)^n} \quad (1)$$

530 where, average fitness of mutant VIM-2 variants was estimated by the calculation of the bacterial  
531 growth rate ( $g$ ) was modelled by a Hill function of the MIC concentration of ampicillin, the relative  
532 growth rate in the absence of ampicillin ( $g_0$ ) the Hill-coefficient ( $n$ ), the concentration of the  
533 antibiotic at which selection was performed  $[C]$ , and finally the concentration at which 50% of  
534 growth of a single population was inhibited ( $EC_{50}$ ). We used the parameters of Equation 1 from  
535 our previous study in which we determined the empirical fitness landscape of VIM-2 populations  
536 (**Supp. Fig. 2a**)<sup>26</sup>. In this previous study, using the correlations between the fitness scores of each  
537 single point mutant of wtVIM-2 under ampicillin selection with the  $EC_{50}$  level of each single point  
538 mutant. The dose-sensitivity parameter Hill-coefficient ( $n$ ) was estimated to be 5. Using the DME  
539 of wtVIM-2 and the empirically obtained the fitness-phenotype-environment relationships,  
540 population genetic simulations reflecting neutral drift experiments VIM-2 variants were  
541 conducted to obtain the physiological fitness landscape of antibiotic resistance in our model  
542 system.

543 We first divided the phenotype space of  $EC_{50}$  values into  $n=1,000$  different states, ranging from  
544  $EC_{50}=0$  to  $EC_{50}=10,000$ . We assumed that a VIM-2 variant occupies one of these states and can  
545 transition from one to another by single point mutations. We then took an approach akin to  
546 Discrete Time Markov Chain simulations to simulate the evolutionary trajectory of VIM-2 in our  
547 experiments<sup>47</sup>. We constructed a 1,000 by 1,000 matrix that represents the transition probability  
548 matrix for transitions between different states and simulated the evolution of 1,000 Markov  
549 chains, each representing a VIM-2 variant in the population. All these Markov chains were initially  
550 in the same state and evolved to other states according to our transition probabilities.

551 The transition probability between each two states ( $i$ , and  $j$ ) is the product of two probabilities,  
552 one that represents mutations,  $P_{mutation}(i \rightarrow j)$ , and the other represents selection,  
553  $P_{selection}(i \rightarrow j)$ :

$$554 P_{i \rightarrow j} = P_{mutation}(i \rightarrow j) \cdot P_{selection}(i \rightarrow j) \quad (2)$$

555 We calculated  $P_{mutation}(i \rightarrow j)$ , i.e., the probability that VIM-2 transitions from the state  $i^{th}$  to  
556  $j^{th}$  with single point mutations, from experimentally determined DME distribution. The second  
557 term,  $P_{selection}(i \rightarrow j)$ , shows the fixation probability of such mutations. To estimate this  
558 probability, we related  $EC_{50}$  to fitness (Equation 1), and calculated the selection coefficient of any  
559 arising mutation on the wtVIM-2 background as:

$$560 \quad s = \frac{F_{mut} - F_{WT}}{F_{WT}} = \frac{\frac{1}{1+(0.5)\left(\frac{[C]}{EC_{50mut}}\right)^n} - \frac{1}{1+(0.5)\left(\frac{[C]}{EC_{50WT}}\right)^n}}{\frac{1}{1+(0.5)\left(\frac{[C]}{EC_{50WT}}\right)^n}} \quad (3)$$

561 Here, [C] is the concentration of ampicillin in the media which takes the values of 10  $\mu\text{g}/\text{ml}$  and  
562 1,000  $\mu\text{g}/\text{ml}$ , corresponding to the weak and the strong selection strengths used for the two  
563 experimental neutral drift trajectories, respectively. We then used the probability of fixation of  
564 arising mutations in a monoclonal haploid population from the Kimura formula<sup>48</sup>:

$$565 \quad P_{fix} = \frac{1 - e^{-2s}}{e^{-2N_{eff}s}} \quad (4)$$

566 where  $N_{eff}$  is the effective population size and is  $10^4$  in our simulations which is  $\sim$  equal to the  
567 number of colonies sampled from LB-agar plates in each generation. We started the simulations  
568 with  $10^4$  Markov chains all starting from a single state (i.e., initial  $EC_{50}$  value), and let these states  
569 evolve according to the transition probabilities and recorded their states after 100 rounds of  
570 mutation and selection (**Supp. Fig. 2b**).

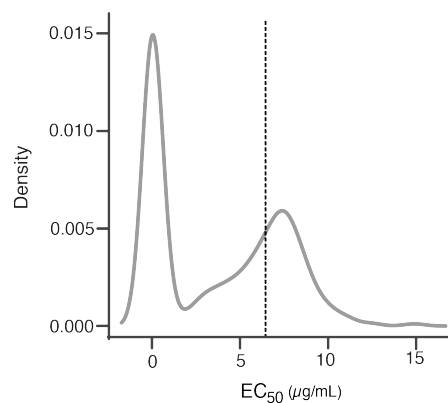

571  
572 **Supplementary Fig. 1. Distribution of the fitness effects of mutation on  $EC_{50}$  converted from DMS scores using**  
573 **Equation 1.** The dashed line represents  $EC_{50}$  of the wtVIM-2.

574 We observed that simulation of  $ND_{Lo}$  trajectory shows an excellent agreement with the results  
575 obtained experimentally (**Supp. Fig. 2c**).

576 Moving forward, we also investigated the effect of increasing the selection strength (ampicillin  
577 concentration in experiments) on the evolutionary dynamics of our simulated VIM2 populations  
578 to understand the possible differences between ND<sub>Lo</sub> and ND<sub>Hi</sub> populations. To this aim, we  
579 systematically varied the ampicillin concentration in our simulations and generated evolutionary  
580 trajectories for populations with [AMP]=10, 100, 200, 300, 400, 500, 600, 700, 800, 900, and  
581 1,000  $\mu\text{g}/\text{mL}$  (**Supp. Fig. 2d**). For all these simulated populations, the mutation-selection balance  
582 was established within 15-20 mutations, in agreement with our observations in ND<sub>Lo</sub> and ND<sub>Hi</sub>  
583 populations.

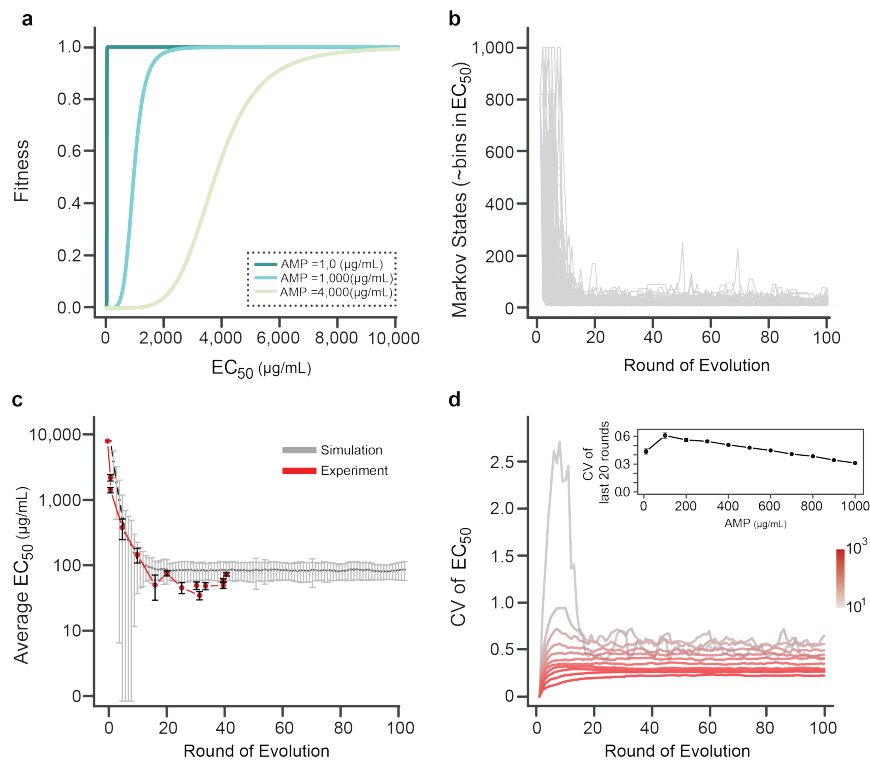

584

585 **Supplementary Fig. 2. Simulation of the neutral drift versus experimental data.** a, Fitness function relating growth  
586 rate to EC<sub>50</sub> at ampicillin concentrations of 10, 1,000 and, 4,000  $\mu\text{g}/\text{mL}$  shown in dark cyan, cyan and light green,  
587 respectively. b, The evolutionary dynamics of the ND<sub>Lo</sub> population. Each individual VIM-2 protein transitions between  
588 different Markov states that corresponds to different EC<sub>50</sub> bins by mutations. The probability of fixation is calculated  
589 from Equation 2. In this plot, all variants have an initial EC<sub>50</sub> of 8192  $\mu\text{g}/\text{mL}$ . c, Simulated (in gray) versus experimental  
590 (in red) average EC<sub>50</sub> of the population as a function of the number of amino acid mutations. d, The coefficient of  
591 variation (CV) of the simulated population's EC<sub>50</sub> as a function of ampicillin concentration, [AMP]. We varied [AMP]  
592 from 10 to 1,000  $\mu\text{g}/\text{mL}$  in simulations. The inset of panel d shows the average coefficient of variation of EC<sub>50</sub> in the  
593 last 20 rounds of evolution for populations evolving under different ampicillin concentrations.

594 One interesting distinction between simulated populations at lower and higher ampicillin  
595 concentrations was the degree to which these trajectories were subject to neutral drift. As a  
596 result of the fitness function around the average MIC of the adapted population ( $\sim 11,000 \mu\text{g}/\text{mL}$ )  
597 neutral drift causes a decrease in EC<sub>50</sub> proportional to the rate of fixation of neutral mutations ( $\sim$   
598  $1/N_{\text{eff}}$ ) for populations that are subjected to selection at lower ampicillin concentrations. In

599 contrast, the resistance fitness landscapes at higher ampicillin concentrations are more curved  
600 compared to lower concentrations, leading to a stronger selection pressure in the evolution of  
601 such populations (**Supp. Fig. 2a**). Therefore, upon the first mutational cycle both forces of  
602 mutation and selection more likely influence the MIC values of different variants in trajectories  
603 undergoing selection with higher ampicillin concentrations, compared to the trajectories with  
604 lower ampicillin concentrations which expectedly results in a lower coefficient of variation of  
605 phenotypic values. Indeed, the coefficient of variation of  $EC_{50}$  values decreased as the ampicillin  
606 concentration increased from 10  $\mu\text{g/ml}$  to 1,000  $\mu\text{g/ml}$  (**Supp. Fig. 2d**). This result is in full  
607 agreement with the observed differences between  $ND_{Lo}$  and  $ND_{Hi}$  (**Supp. Table 1, 2**). Altogether,  
608 neutral drift permits exploration of a wider range of fitness landscape at lower antibiotic selection  
609 thresholds.

## 610 **Extended Data Figures**

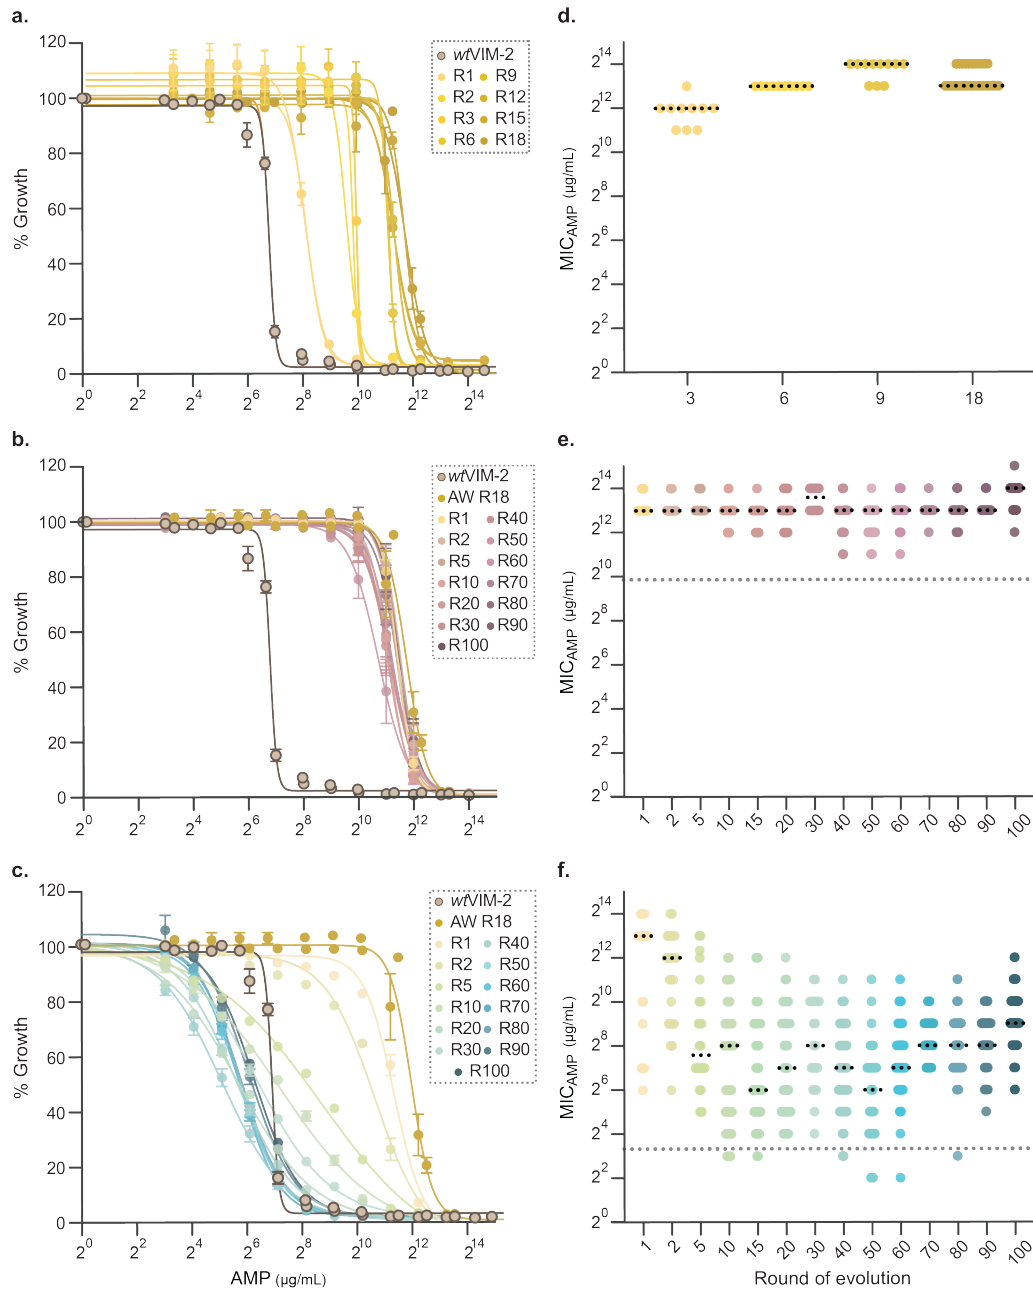

611

612 **Extended Data Fig. 1. Population and individual level phenotypic analysis of the AW, ND<sub>Hi</sub> and ND<sub>Lo</sub> libraries. a-c,**  
613 **Ampicillin dose-response assay curves of select libraries from the AW (a), ND<sub>Hi</sub> (b) and ND<sub>Lo</sub> (c) libraries. Error bars**  
614 **depict standard error. At least 2 biological replicates were carried out for each DR assay. d-f, Distribution of ampicillin**  
615 **minimum inhibitory concentration (MIC<sub>AMP</sub>) values of 24-96 individual variants randomly picked from the AW (d),**  
616 **ND<sub>Hi</sub> (e), and ND<sub>Lo</sub> (f) libraries. The average MIC<sub>AMP</sub> of the libraries is shown with black dots, while the antibiotic**  
617 **selection threshold the libraries were subjected to is shown with grey dots. The data for the figures can be found in**  
618 **Supplementary Data 3, 4.**



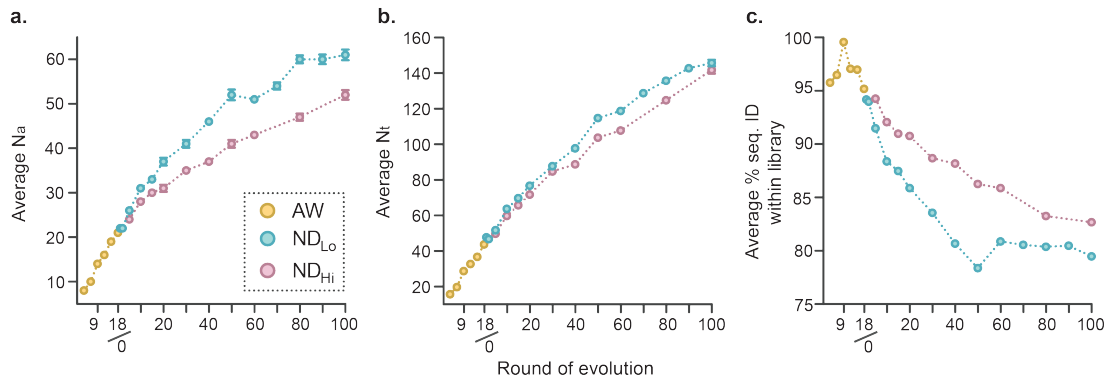

619

620 **Extended Data Fig. 2. Genotypic analysis of the AW, ND<sub>Hi</sub> and ND<sub>Lo</sub> libraries. a, b,** Average number of nucleotide  
621 mutations (N<sub>t</sub>) (a) and amino acid mutations (N<sub>a</sub>) (b) present in the experimental evolution libraries, compared to  
622 *wtVIM-2*. Error bars depict standard error. c, Average percent sequence identity shared between the enzyme  
623 variants within the evolution libraries. The data for the figures are shown in **Supplementary Table 3**, and can be  
624 found in **Supplementary Data 2**.

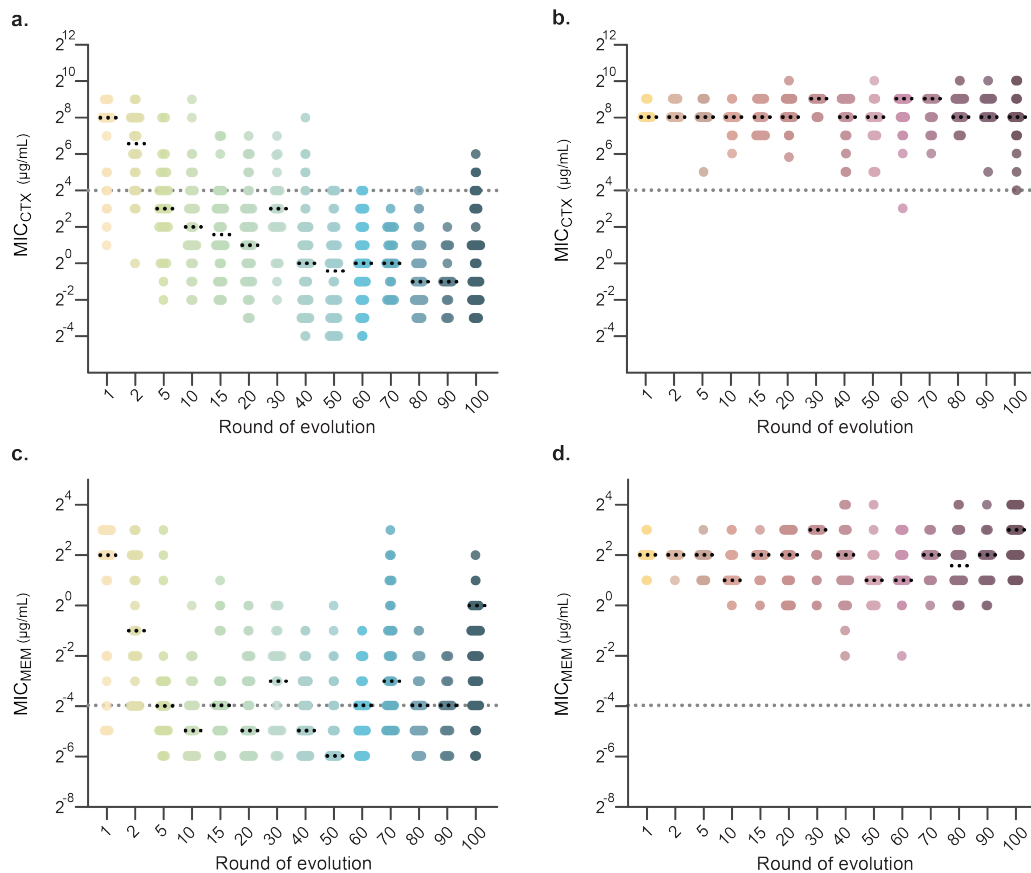

625

626 **Extended Data Fig. 3. Phenotypic analysis of individual variants from the AW, ND<sub>Hi</sub> and ND<sub>Lo</sub> libraries for non-**  
627 **selected β-lactam antibiotics.** Distribution of cefotaxime and meropenem minimum inhibitory concentration MIC  
628 values of 24-96 individual variants randomly picked from ND<sub>Lo</sub> (a, c) and ND<sub>Hi</sub> (b, d) libraries, respectively. Mean MIC  
629 for each library is shown as black dots, and the *wtVIM-2* resistance level for each antibiotic is shown as grey dots.  
630 The data for the figures can be found in **Supplementary Data 3**.

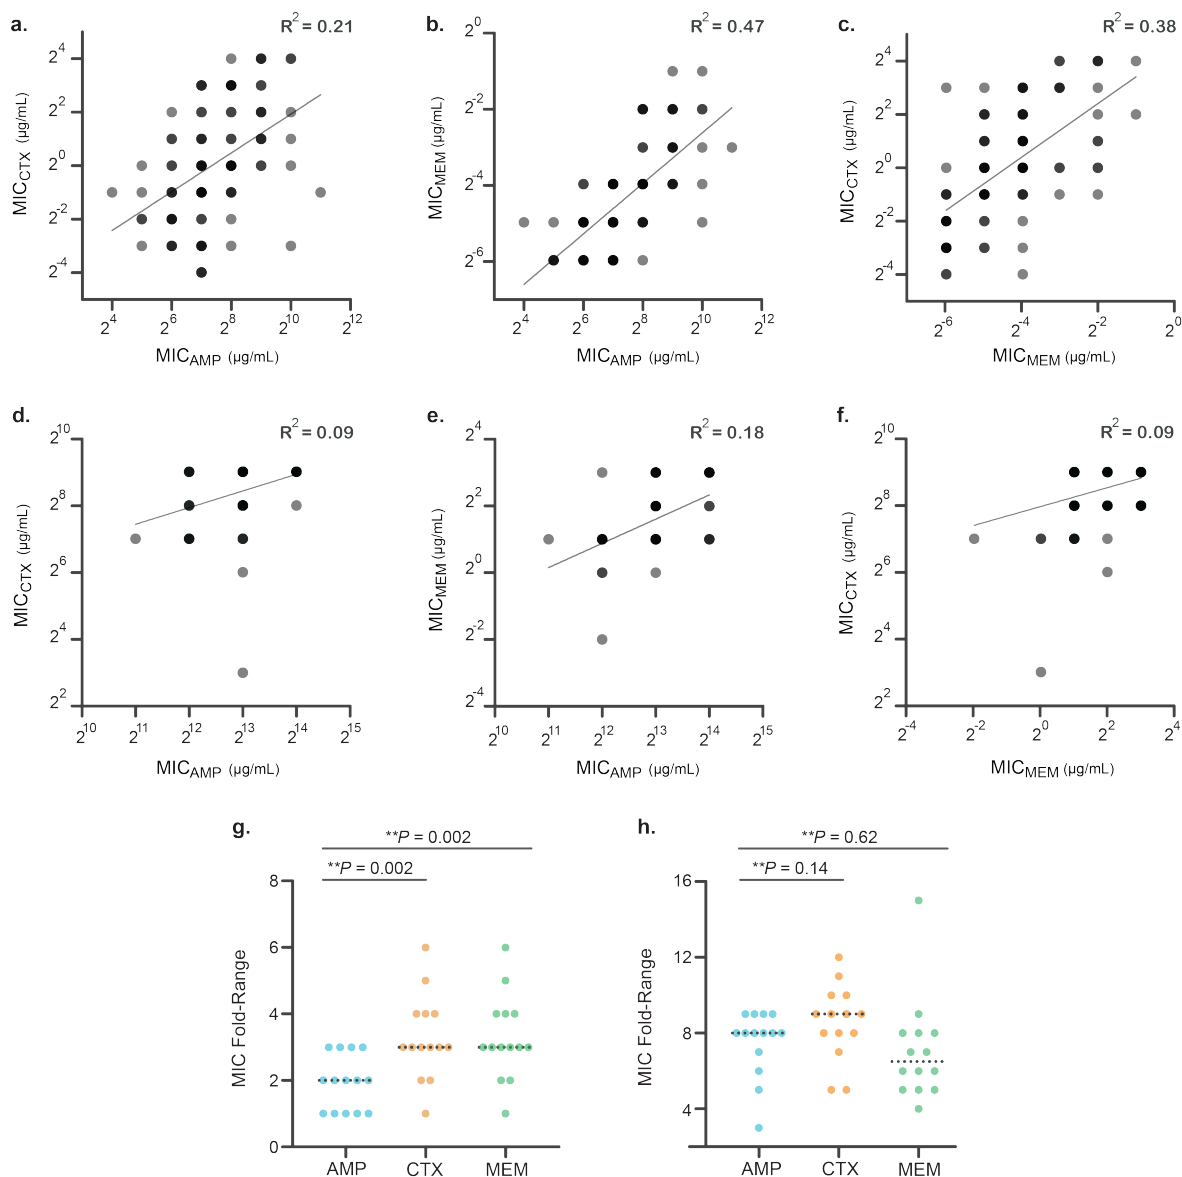

631  
 632 **Extended Data Fig. 4. Comparisons of the MICs of individual variants for non-selected and selected  $\beta$ -lactam**  
 633 **antibiotics. a-f,** Correlation of the log<sub>2</sub> of cefotaxime and ampicillin, meropenem and ampicillin, and cefotaxime and  
 634 meropenem MICs of 91 individual variants from the ND<sub>Lo</sub> (a-c) ND<sub>Hi</sub> R60 (d-f) libraries, each (total  $n=182$ ). The  
 635 correlation coefficient for each pair is given on the top right of the graphs. Grey dots reflect resistance phenotypes  
 636 observed in a single individual, while black dots reflect ones with >2 variants. **g-h.** Comparison of the fold-difference  
 637 range of ampicillin (blue), cefotaxime (orange) and meropenem (green) MICs of 91 individual variants from the ND<sub>Lo</sub>  
 638 (g) ND<sub>Hi</sub> (h) R60 libraries, each.  $P$ -values calculated via unpaired two-sided t-test on the 2-fold difference range of  
 639 ampicillin and non-selected antibiotic MICs are shown on the top of the graphs. The data used for the figures can be  
 640 found in **Supplementary Data 3**.

641

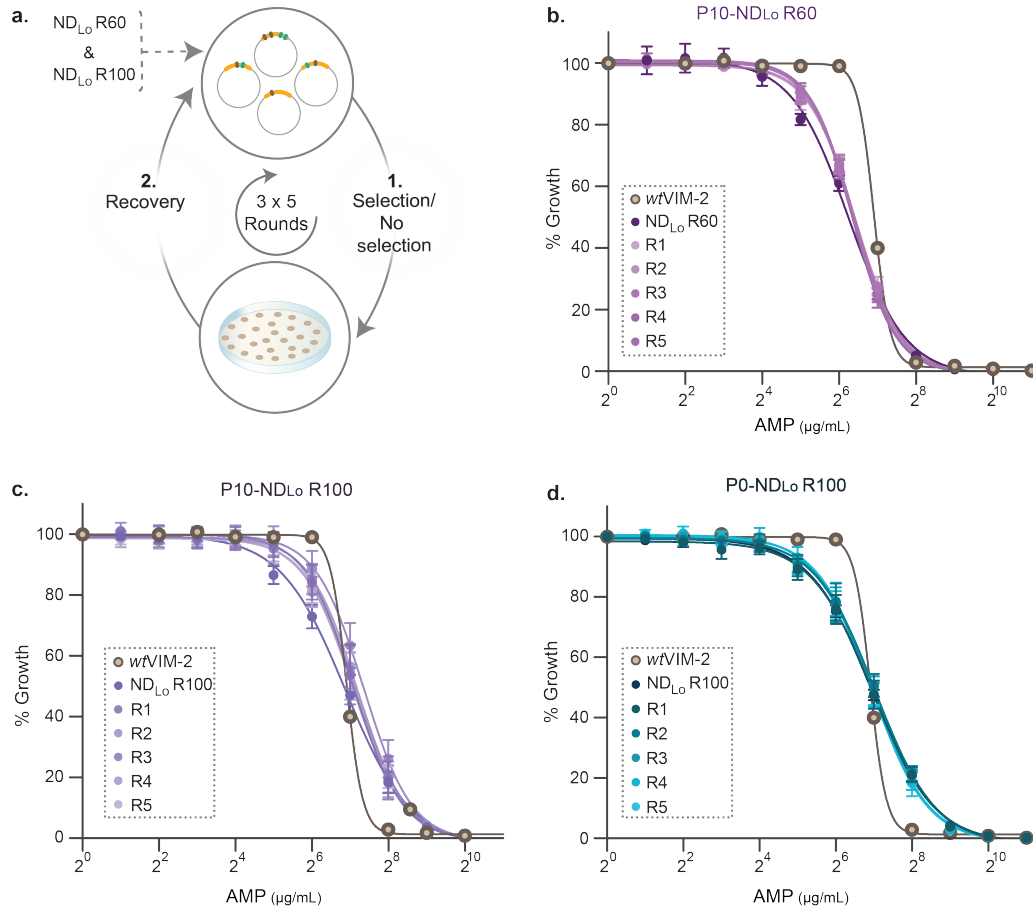

642

643 **Extended Data Fig. 5. Scheme of passaging experiments and population-level phenotypic characteristics.** a,  
644 Scheme depicting the passaging experiments of ND<sub>Lo</sub> R60 and R100 libraries under selection by 10 µg/mL ampicillin  
645 (P10-ND<sub>Lo</sub> R60 and P10-ND<sub>Lo</sub> R100, respectively), and of ND<sub>Lo</sub> R100 under no selection by ampicillin (P0-ND<sub>Lo</sub> R100).  
646 Ampicillin dose-response assay curves of the five P10-ND<sub>Lo</sub> R60 (b), P10-ND<sub>Lo</sub> R100 (c), and P0-ND<sub>Lo</sub> R100 (d) libraries.  
647 Error bars depict the standard deviation, two biological replicates were carried out for each library. The data for the  
648 figures are presented in **Supplementary Data 4**.

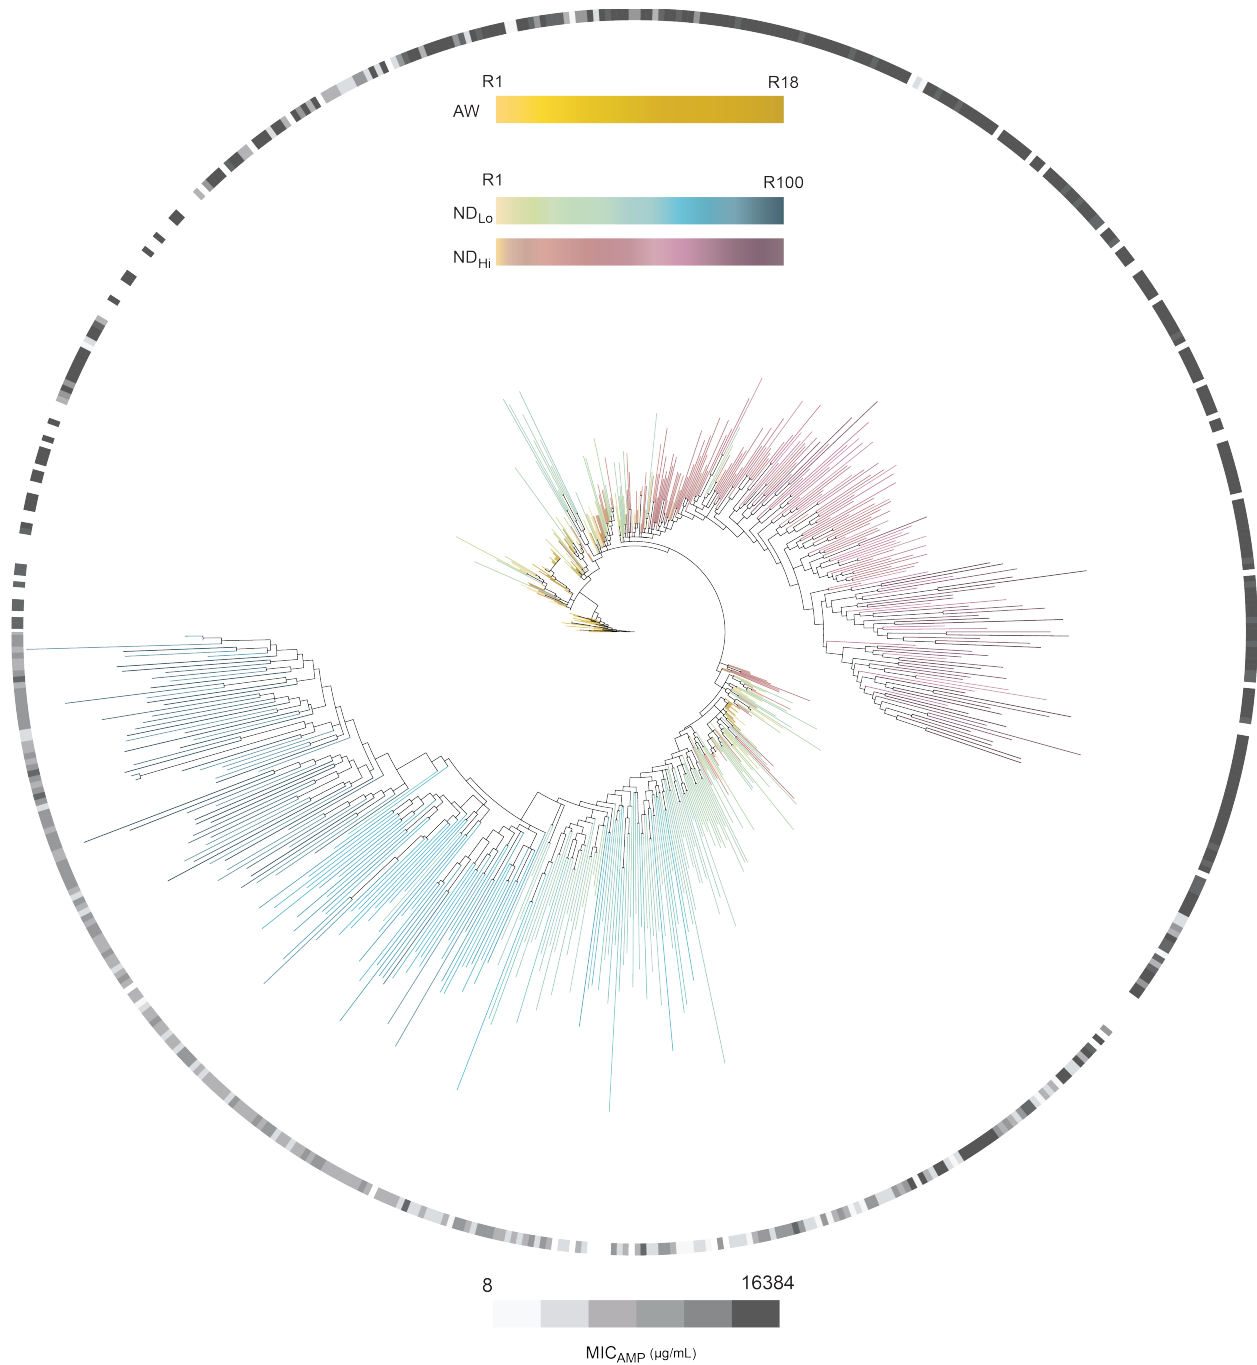

649

650 **Extended Data Fig. 6. Phylogenetic tree of AW, ND<sub>Lo</sub> and ND<sub>Hi</sub> variants and their ampicillin resistance levels.**

651 Phylogenetic tree constructed from the nucleotide sequences of 24-96 individual variants randomly picked from the  
652 AW (yellow-orange) ND<sub>Lo</sub> (light green-dark blue) and ND<sub>Hi</sub> (orange-magenta) libraries, where the MIC<sub>AMP</sub> of each  
653 variant is color-coded by shades of grey (white: no MIC data; light grey: 8 µg/mL; dark grey = 16,384 µg/mL). The  
654 sequences used for the tree can be found and their association with each ampicillin MIC can be found in  
655 **Supplementary Data 2**, and all DNA sequences can be found in **Supplementary Data 8**.

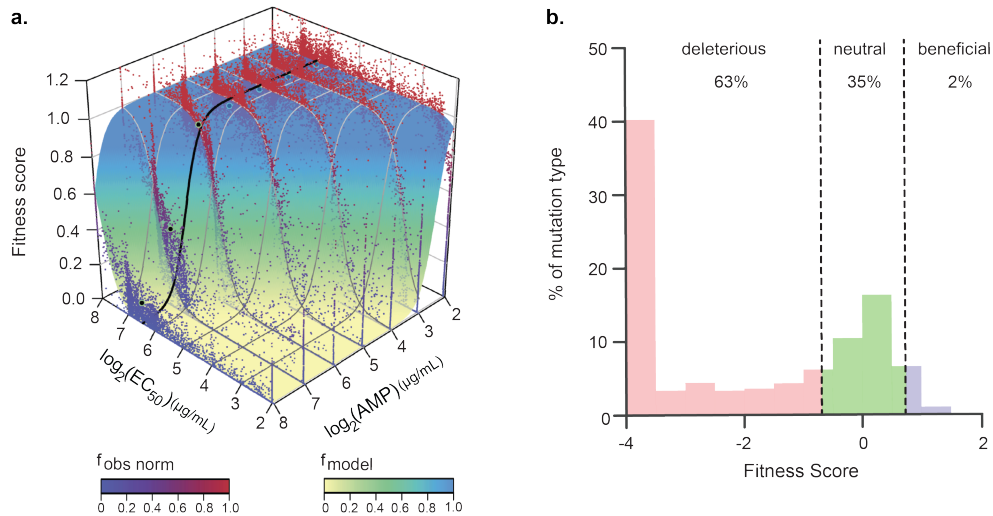

656

657 **Extended Data Fig. 7. The wtVIM-2 phenotype-fitness landscape and DME.** **a,** The wtVIM-2 phenotype-fitness  
 658 landscape as a function of EC<sub>50</sub> and AMP concentration is shown. The dots ('f<sub>obs norm</sub>') reflects the observed fitness  
 659 score is plotted in relation to the AMP concentration during selection, and the surface ('f<sub>model</sub>') reflects modelled  
 660 fitness scores of the single point mutants across different AMP concentrations. *Adapted from Chen et al., 2021*<sup>26</sup>. **b,**  
 661 Distribution of fitness effects for all single amino acid variants of wtVIM-2. The vertical grey lines indicate fitness  
 662 score (f-score) cut-offs used to classify fitness effects as positive (0.7 < f-score < 4), neutral (-0.7 ≤ f-score ≤ 0.7), or  
 663 negative (-4 < f-score < -0.7). (The fitness scores for each single VIM-2 mutant were calculated where the selective  
 664 ampicillin concentration is equal to the EC<sub>50</sub> of wtVIM-2, was used to calculate the effect of each mutation on EC<sub>50</sub>,  
 665 shown in fig. MS1.) *Adapted from Chen, et al., 2020*<sup>25</sup>.

666

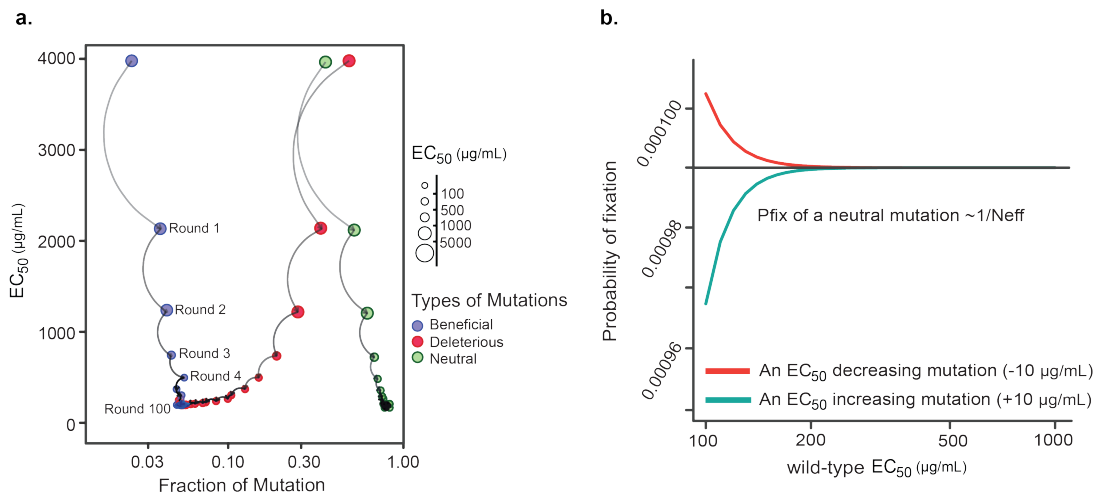

667

668 **Extended Data Fig. 8. Mutation-selection balance in ND<sub>Lo</sub> and probability of fixation of mutations.** **a,** Established  
 669 mutation-selection balance in the antibiotic-resistance level of the simulated ND<sub>Lo</sub> trajectory population. The fraction  
 670 of fixated mutations that are beneficial (blue), deleterious (red) and neutral (green) on the fitness of evolved enzyme  
 671 variants from the ND<sub>Lo</sub> trajectory as a function of the average ampicillin EC<sub>50</sub> of each library. The size of the dots  
 672 reflects the average EC<sub>50</sub> of the library. The product of the effective population size and the selection coefficient  
 673 ( $N_{\text{eff}} \times s$ ) is used to count the fraction of deleterious ( $N_{\text{eff}} \times s < -1$ ), beneficial ( $N_{\text{eff}} \times s > 1$ ), and neutral ( $|N_{\text{eff}} \times s| < 1$ )  
 674 substitutions. For all simulations,  $N_{\text{eff}}$  is  $10^4$  which is ~ equal to the number of colonies sampled from LB-agar plates  
 675 in each generation. Data and calculations used for the plot can be found in **Supplementary Data 6** (effects of

676 mutations on fitness and  $EC_{50}$ ) and **7** (percentages of mutations categorized based on their effect on  $EC_{50}$  and fitness).  
677 **b**, Probability of fixation of mutations in the  $ND_{Lo}$  trajectory as a function of variant ampicillin  $EC_{50}$ . The probability  
678 of fixation of a mutation that either increases (red) or decreases (blue) the ampicillin  $EC_{50}$  of a variant evolving under  
679 the  $ND_{Lo}$  trajectory is plotted for variants with different  $EC_{50}$  values. The probability of fixation of mutations that  
680 decrease or increase ampicillin  $EC_{50}$  of a variant with an  $EC_{50}$  above  $\sim 200$   $\mu\text{g}/\text{mL}$  becomes indistinguishable from  
681 neutral mutations ( $P_{\text{fix}} \sim 1/N_{\text{eff}}$ ).

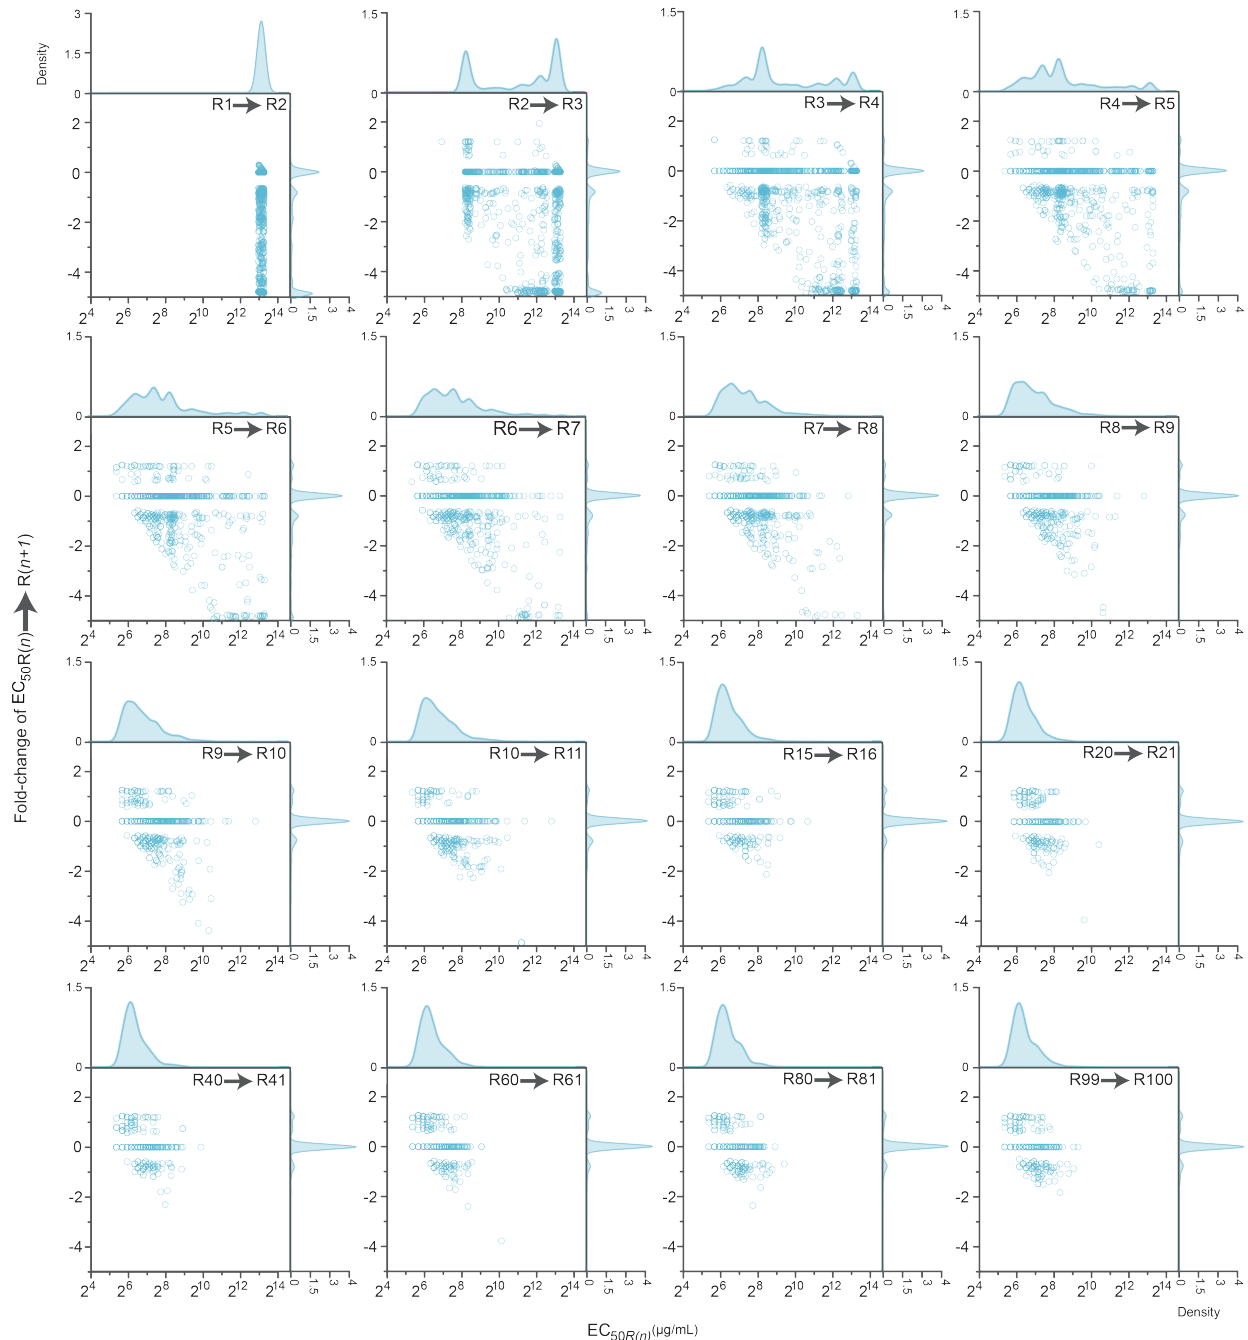

682 **Extended Data Fig. 9. DME on the ampicillin  $EC_{50}$  of VIM-2 variants in the simulation of the  $ND_{Lo}$  evolution**  
683 **trajectory.** Scatter plots show the distribution of mutational effects on the ampicillin  $EC_{50}$  of variants evolving under  
684 the simulated  $ND_{Lo}$  regime, in comparison to the ampicillin  $EC_{50}$  of the  $10^3$  variants before acquiring the mutation.  
685 The mutational effects on resistance level are shown for the simulated variants as they move from  $R(n)$  to  $R(n+1)$ .  
686

687 The change was calculated as the  $\log_2$ -scale fold-change in the  $EC_{50}$  of each variant at round ( $n+1$ ) compared to the  
 688 previous round ( $n$ ). The gaussian kernel density distribution of the effect of mutations on resistance (*i.e.*,  $\log_2$  fold-  
 689 change in  $EC_{50}$ ) and distribution of  $EC_{50}$  values of variants before acquiring the mutation is shown on the top and  
 690 right axes in lighter grey (bandwidth=0.02). Data and calculations can be found in **Supplementary Data 6**. The relative  
 691 percentage of each type of mutation based on its effect on fitness and  $EC_{50}$  can be found in **Supplementary Data 7**.

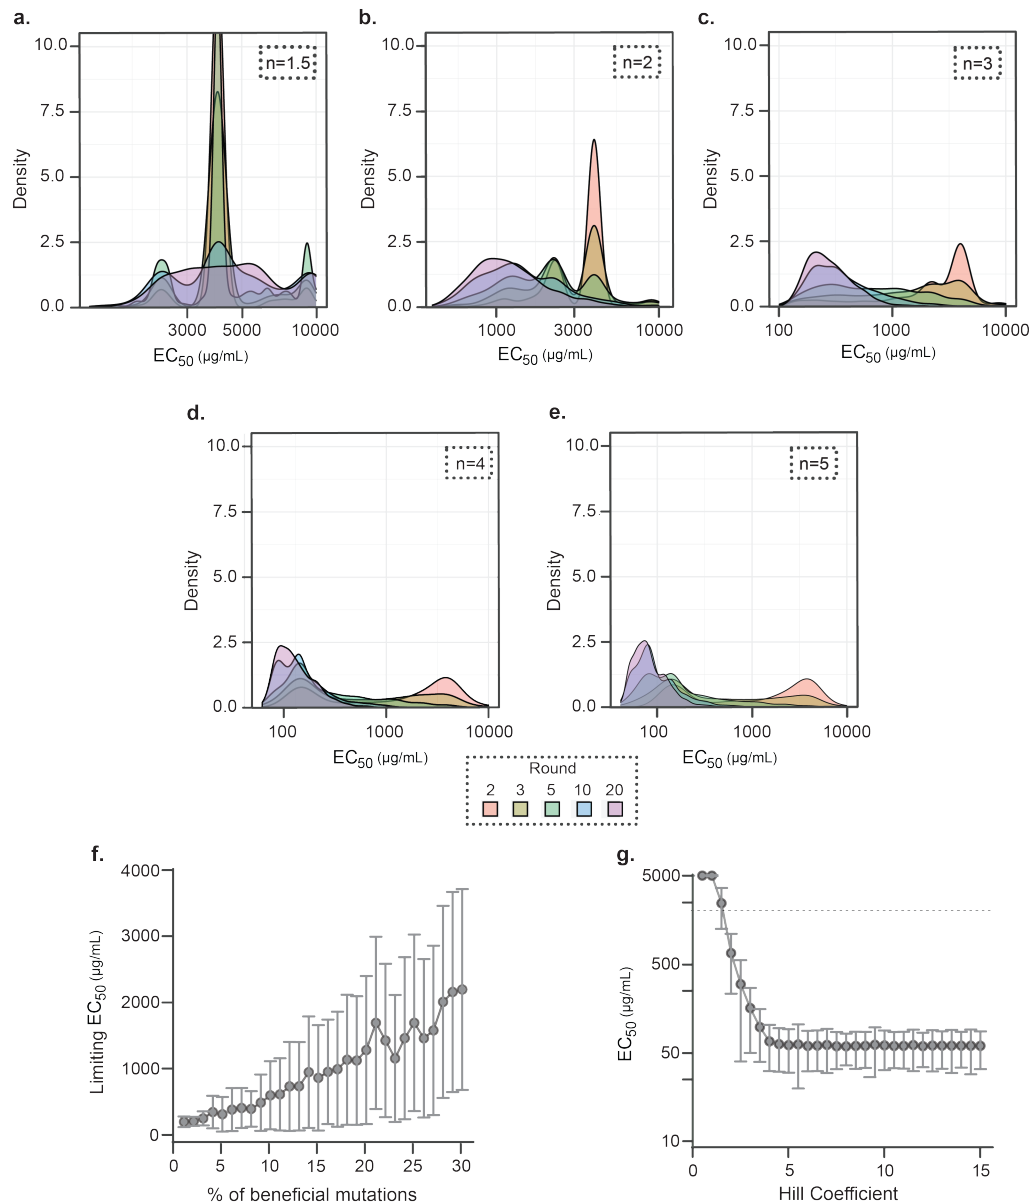

692

693 **Extended Data Fig. 10. Simulation of the  $ND_{Lo}$  evolution trajectory under different conditions and sensitivity of**  
 694 **equilibrium values to parameters. a-e,** Simulated distribution of  $EC_{50}$  values of variants evolving under the  $ND_{Lo}$   
 695 trajectory with different hill coefficients:  $n=1.5$  (a),  $n=2$  (b),  $n=3$  (c),  $n=4$  (d),  $n=5$  (e); cross 20 rounds of mutagenesis  
 696 and selection. **f, g,** Relationship between the percentage of positive mutations available and the limiting average  
 697  $EC_{50}$  and its variation (f), and the dose-response growth curve hill coefficient of individual VIM-2 variants and the  
 698 average  $EC_{50}$  (g) of the population when it stabilizes at mutation-selection balance on a threshold-like landscape.

699 **Supplementary Tables**

**Supplementary Table 1** | Resistance phenotype characteristics of AW, ND<sub>Lo</sub>, and ND<sub>Hi</sub> libraries.

|                  | n | EC <sub>50</sub> | EC <sub>10</sub> | EC <sub>90</sub> | EC <sub>90</sub> / EC <sub>10</sub> |
|------------------|---|------------------|------------------|------------------|-------------------------------------|
| wtVIM-2          | 4 | 93 ± 7.3         | 62 ± 5.9         | 140 ± 11         | 2.3 ± 0.14                          |
| AW               |   |                  |                  |                  |                                     |
| Round            | n | EC <sub>50</sub> | EC <sub>10</sub> | EC <sub>90</sub> | EC <sub>90</sub> / EC <sub>10</sub> |
| 1                |   | 270 ± 3          | 160 ± 7          | 460 ± 9          | 2.9 ± 0.17                          |
| 2                |   | 780 ± 40         | 546 ± 30         | 1110 ± 50        | 2.0 ± 0.02                          |
| 3                |   | 1000 ± 10        | 898 ± 20         | 1120 ± 10        | 1.3 ± 0.02                          |
| 6                | 2 | 2200 ± 10        | 1753 ± 120       | 2720 ± 170       | 1.6 ± 0.20                          |
| 9                |   | 2600 ± 210       | 1880 ± 30        | 3650 ± 500       | 1.9 ± 0.23                          |
| 12               |   | 2600 ± 40        | 1534 ± 60        | 4270 ± 300       | 2.8 ± 0.30                          |
| 15               |   | 3400 ± 230       | 2315 ± 180       | 4980 ± 290       | 2.2 ± 0.04                          |
| 18               |   | 3900 ± 290       | 2758 ± 280       | 5540 ± 250       | 2.0 ± 0.12                          |
| ND <sub>Lo</sub> |   |                  |                  |                  |                                     |
| Round            | n | EC <sub>50</sub> | EC <sub>10</sub> | EC <sub>90</sub> | EC <sub>90</sub> / EC <sub>10</sub> |
| 1                |   | 2310 ± 260       | 1110 ± 140       | 4900 ± 200       | 4.7 ± 0.75                          |
| 2                |   | 1500 ± 140       | 390 ± 20         | 5970 ± 840       | 15 ± 1.7                            |
| 5                |   | 410 ± 140        | 22 ± 4.9         | 8780 ± 2010      | 550 ± 260                           |
| 10               |   | 160 ± 40         | 12 ± 3.3         | 2120 ± 191       | 200 ± 40                            |
| 20               |   | 56 ± 23          | 9 ± 2.1          | 380 ± 24         | 51 ± 9.9                            |
| 30               |   | 84 ± 7.3         | 12 ± 1.4         | 500 ± 70         | 52 ± 2.9                            |
| 40               | 4 | 51 ± 9.6         | 11 ± 1.3         | 250 ± 24         | 24 ± 0.6                            |
| 50               |   | 39 ± 5.6         | 7 ± 1.2          | 220 ± 42         | 32 ± 1.9                            |
| 60               |   | 55 ± 7.1         | 17 ± 2.3         | 180 ± 20         | 11 ± 0.5                            |
| 70               |   | 54 ± 6.7         | 19 ± 2.1         | 160 ± 16         | 8.4 ± 0.25                          |
| 80               |   | 55 ± 5.7         | 17 ± 1.2         | 180 ± 15         | 11 ± 0.5                            |
| 90               |   | 66 ± 4.0         | 18 ± 1.4         | 250 ± 32         | 14 ± 2.0                            |
| 100              |   | 81 ± 4.8         | 22 ± 1.5         | 300 ± 58         | 13 ± 2.0                            |
| ND <sub>Hi</sub> |   |                  |                  |                  |                                     |
| Round            | n | EC <sub>50</sub> | EC <sub>10</sub> | EC <sub>90</sub> | EC <sub>90</sub> / EC <sub>10</sub> |
| 1                |   | 2760 ± 10        | 1800 ± 200       | 4130 ± 350       | 2.3 ± 0.04                          |
| 2                |   | 2990 ± 260       | 2020 ± 390       | 4430 ± 760       | 2.2 ± 0.05                          |
| 5                |   | 2700 ± 550       | 1730 ± 250       | 4220 ± 510       | 2.5 ± 0.05                          |
| 10               |   | 2190 ± 360       | 1310 ± 280       | 3690 ± 350       | 2.9 ± 0.36                          |
| 20               |   | 2110 ± 340       | 1210 ± 290       | 3700 ± 240       | 3.2 ± 0.58                          |
| 30               |   | 2300 ± 330       | 1250 ± 430       | 4260 ± 880       | 3.6 ± 0.54                          |
| 40               | 2 | 2380 ± 630       | 1300 ± 390       | 4350 ± 960       | 3.4 ± 0.29                          |
| 50               |   | 1770 ± 620       | 910 ± 300        | 3440 ± 890       | 3.9 ± 0.28                          |
| 60               |   | 2420 ± 520       | 1350 ± 520       | 4360 ± 1200      | 3.4 ± 0.44                          |
| 70               |   | 2490 ± 790       | 1440 ± 440       | 4300 ± 910       | 3.1 ± 0.30                          |
| 80               |   | 2800 ± 640       | 1780 ± 460       | 4500 ± 1100      | 2.5 ± 0.07                          |
| 90               |   | 2960 ± 700       | 1900 ± 200       | 4600 ± 1100      | 2.4 ± 0.30                          |
| 100              |   | 2690 ± 500       | 1590 ± 460       | 4580 ± 740       | 3.0 ± 0.40                          |

700

701 **Supplementary Table 1. Resistance phenotype analysis of the AW, ND<sub>Hi</sub> and ND<sub>Lo</sub> libraries.** The average ampicillin  
702 resistance level (EC<sub>50</sub>) and within-population phenotypic diversity (calculated by dividing the EC<sub>90</sub> and EC<sub>10</sub> for  
703 ampicillin) of the experimental evolution libraries, alongside their SEM values are shown derived from ampicillin  
704 dose response assays in (µg/mL). 'n' reflects the number of independent dose-response assays conducted for each  
705 library. For the raw data used to calculate these values, refer to **Supplementary Data 4**.



Supplementary

Table 2

Resistance phenotypes of individual variants from AW, ND<sub>Lo</sub>, and ND<sub>Hi</sub> libraries.

|                        | n   | Mean         | CV  |
|------------------------|-----|--------------|-----|
| <i>wt</i> VIM-2        | 2   | 100 ± 10     | 0.5 |
| <b>AW</b>              |     |              |     |
| Round                  | n   | Mean         | CV  |
| 3                      | 10  | 4900 ± 600   | 0.5 |
| 6                      | 10  | 8200 ± 0     | 0.0 |
| 9                      | 11  | 14000 ± 1000 | 0.3 |
| 18                     | 29  | 11000 ± 800  | 0.4 |
| <b>ND<sub>Lo</sub></b> |     |              |     |
| Round                  | n   | Mean         | CV  |
| 1                      | 24  | 7300 ± 1000  | 0.8 |
| 2                      | 24  | 4500 ± 1000  | 1.0 |
| 5                      | 24  | 1400 ± 500   | 2.0 |
| 10                     | 48  | 540 ± 100    | 2.0 |
| 15                     | 48  | 460 ± 100    | 2.0 |
| 20                     | 48  | 440 ± 100    | 2.0 |
| 30                     | 23  | 600 ± 100    | 1.0 |
| 40                     | 72  | 250 ± 40     | 1.0 |
| 50                     | 48  | 160 ± 50     | 2.0 |
| 60                     | 92  | 270 ± 30     | 1.0 |
| 70                     | 47  | 390 ± 40     | 0.6 |
| 80                     | 71  | 360 ± 50     | 1.0 |
| 90                     | 48  | 390 ± 40     | 0.8 |
| 100                    | 168 | 780 ± 50     | 0.9 |
| <b>ND<sub>Hi</sub></b> |     |              |     |
| Round                  | n   | Mean         | CV  |
| 1                      | 24  | 9900 ± 1000  | 0.8 |
| 2                      | 24  | 9600 ± 1000  | 1.0 |
| 5                      | 24  | 9900 ± 500   | 2.0 |
| 10                     | 48  | 8000 ± 100   | 2.0 |
| 15                     | 48  | 7300 ± 100   | 2.0 |
| 20                     | 48  | 9100 ± 100   | 2.0 |
| 30                     | 23  | 12000 ± 100  | 1.0 |
| 40                     | 72  | 7900 ± 40    | 1.0 |
| 50                     | 48  | 6200 ± 50    | 2.0 |
| 60                     | 92  | 8700 ± 30    | 1.0 |
| 70                     | 47  | 8400 ± 40    | 0.6 |
| 80                     | 71  | 8100 ± 50    | 1.0 |
| 90                     | 48  | 9300 ± 40    | 0.8 |
| 100                    | 93  | 14000 ± 50   | 0.9 |

706

707 **Supplementary Table 2. Phenotypic analysis of individual variants from the AW, ND<sub>Hi</sub> and ND<sub>Lo</sub> libraries.** The  
 708 averages ampicillin minimum inhibitory concentration and the coefficient of variation of MIC values of experimental  
 709 evolution libraries are shown in (µg/mL). The coefficient of variation of MIC values of individual variants from the  
 710 same library is used to estimate within-library phenotypic diversity. For the raw data used to calculate these values,  
 711 refer to **Supplementary Data 3**.

Supplementary Table 3 | Nucleotide and amino acid sequence analysis of individual variants from the AW, ND<sub>Lo</sub>, and ND<sub>Hi</sub> libraries.

| AW    |    |                      |       |              |       |       |       |                      |       |         |       |       |        |                             |       |                                 |       |
|-------|----|----------------------|-------|--------------|-------|-------|-------|----------------------|-------|---------|-------|-------|--------|-----------------------------|-------|---------------------------------|-------|
| Round | n  | Nucleotide Mutations |       |              |       |       |       | Amino Acid Mutations |       |         |       | Na/Nt |        | Percent Identity to wtVIM-2 |       | Percent Identity within Library |       |
|       |    | Transition           |       | Transversion |       | Total |       | Signal Peptide       |       | Protein |       | Mean  | SEM    | Mean                        | SEM   | Mean                            | SEM   |
|       |    | Mean                 | SEM   | Mean         | SEM   | Mean  | SEM   | Mean                 | SEM   | Mean    | SEM   |       |        |                             |       |                                 |       |
| 3     | 19 | 9                    | ± 0.6 | 6            | ± 0.5 | 15    | ± 0.8 | 3                    | ± 0.2 | 8       | ± 0.3 | 0.52  | ± 0.03 | 97.1                        | ± 0.1 | 95.8                            | ± 0.1 |
| 6     | 17 | 12                   | ± 0.6 | 7            | ± 0.7 | 19    | ± 0.8 | 3                    | ± 0.2 | 10      | ± 0.4 | 0.53  | ± 0.02 | 96.2                        | ± 0.2 | 96.5                            | ± 0.1 |
| 9     | 21 | 19                   | ± 0.5 | 9            | ± 0.1 | 28    | ± 0.5 | 3                    | ± 0.1 | 14      | ± 0.2 | 0.48  | ± 0.01 | 94.9                        | ± 0.1 | 99.6                            | ± 0.0 |
| 12    | 17 | 23                   | ± 0.5 | 10           | ± 0.4 | 32    | ± 0.1 | 4                    | ± 0.1 | 16      | ± 0.5 | 0.49  | ± 0.01 | 94.0                        | ± 0.2 | 97.1                            | ± 0.1 |
| 15    | 18 | 27                   | ± 0.5 | 10           | ± 0.4 | 36    | ± 0.8 | 5                    | ± 0.2 | 19      | ± 0.4 | 0.51  | ± 0.01 | 93.1                        | ± 0.2 | 97.0                            | ± 0.1 |
| 18    | 23 | 31                   | ± 0.6 | 12           | ± 0.6 | 43    | ± 0.8 | 5                    | ± 0.1 | 21      | ± 0.5 | 0.50  | ± 0.01 | 91.9                        | ± 0.2 | 95.2                            | ± 0.1 |

  

| ND <sub>Lo</sub> |    |                      |       |              |       |       |       |                      |       |         |       |       |        |                             |       |                                 |       |
|------------------|----|----------------------|-------|--------------|-------|-------|-------|----------------------|-------|---------|-------|-------|--------|-----------------------------|-------|---------------------------------|-------|
| Round            | n  | Nucleotide Mutations |       |              |       |       |       | Amino Acid Mutations |       |         |       | Na/Nt |        | Percent Identity to wtVIM-2 |       | Percent Identity within Library |       |
|                  |    | Transition           |       | Transversion |       | Total |       | Signal Peptide       |       | Protein |       | Mean  | SEM    | Mean                        | SEM   | Mean                            | SEM   |
|                  |    | Mean                 | SEM   | Mean         | SEM   | Mean  | SEM   | Mean                 | SEM   | Mean    | SEM   |       |        |                             |       |                                 |       |
| 1                | 24 | 34                   | ± 0.7 | 13           | ± 0.6 | 47    | ± 0.9 | 6                    | ± 0.2 | 22      | ± 0.5 | 0.48  | ± 0.01 | 91.6                        | ± 0.2 | 94.2                            | ± 0.1 |
| 2                | 24 | 33                   | ± 0.8 | 13           | ± 0.5 | 46    | ± 0.9 | 6                    | ± 0.2 | 22      | ± 0.5 | 0.49  | ± 0.01 | 91.6                        | ± 0.2 | 94.0                            | ± 0.1 |
| 5                | 21 | 35                   | ± 0.9 | 16           | ± 0.8 | 51    | ± 1.2 | 6                    | ± 0.3 | 26      | ± 0.7 | 0.51  | ± 0.01 | 90.3                        | ± 0.2 | 91.5                            | ± 0.1 |
| 10               | 21 | 45                   | ± 1.0 | 18           | ± 0.8 | 63    | ± 1.3 | 8                    | ± 0.4 | 31      | ± 0.7 | 0.50  | ± 0.01 | 88.2                        | ± 0.3 | 88.4                            | ± 0.1 |
| 15               | 23 | 49                   | ± 1.0 | 20           | ± 0.7 | 69    | ± 1.1 | 9                    | ± 0.3 | 33      | ± 0.7 | 0.48  | ± 0.01 | 87.6                        | ± 0.3 | 87.5                            | ± 0.1 |
| 20               | 22 | 54                   | ± 1.2 | 23           | ± 0.7 | 76    | ± 1.2 | 9                    | ± 0.2 | 37      | ± 0.9 | 0.49  | ± 0.01 | 86.0                        | ± 0.3 | 85.9                            | ± 0.1 |
| 30               | 25 | 60                   | ± 1.2 | 27           | ± 0.8 | 87    | ± 1.3 | 10                   | ± 0.3 | 41      | ± 0.9 | 0.47  | ± 0.01 | 84.6                        | ± 0.3 | 83.6                            | ± 0.1 |
| 40               | 29 | 69                   | ± 0.9 | 28           | ± 0.8 | 97    | ± 1.0 | 11                   | ± 0.4 | 46      | ± 0.7 | 0.48  | ± 0.01 | 82.6                        | ± 0.2 | 80.7                            | ± 0.1 |
| 50               | 18 | 79                   | ± 1.1 | 35           | ± 1.0 | 114   | ± 1.7 | 13                   | ± 0.6 | 52      | ± 1.2 | 0.46  | ± 0.01 | 80.3                        | ± 0.4 | 78.4                            | ± 0.2 |
| 60               | 37 | 83                   | ± 1.1 | 36           | ± 0.8 | 118   | ± 1.2 | 11                   | ± 0.3 | 51      | ± 0.7 | 0.43  | ± 0.00 | 80.6                        | ± 0.3 | 80.9                            | ± 0.1 |
| 70               | 22 | 90                   | ± 1.5 | 37           | ± 2.0 | 128   | ± 1.6 | 12                   | ± 0.5 | 54      | ± 0.8 | 0.42  | ± 0.00 | 79.6                        | ± 0.3 | 80.6                            | ± 0.2 |
| 80               | 23 | 65                   | ± 1.6 | 40           | ± 1.1 | 135   | ± 1.7 | 12                   | ± 0.3 | 60      | ± 0.9 | 0.44  | ± 0.00 | 77.4                        | ± 0.3 | 80.4                            | ± 0.2 |
| 90               | 21 | 97                   | ± 1.2 | 45           | ± 1.2 | 142   | ± 1.6 | 14                   | ± 0.4 | 60      | ± 1.1 | 0.42  | ± 0.01 | 76.9                        | ± 0.4 | 80.5                            | ± 0.2 |
| 100              | 23 | 99                   | ± 1.7 | 46           | ± 1.0 | 145   | ± 1.8 | 14                   | ± 0.4 | 61      | ± 1.2 | 0.42  | ± 0.01 | 76.4                        | ± 0.4 | 79.5                            | ± 0.1 |

  

| ND <sub>Hi</sub> |    |                      |       |              |       |       |       |                      |       |         |       |       |        |                             |       |                                 |       |
|------------------|----|----------------------|-------|--------------|-------|-------|-------|----------------------|-------|---------|-------|-------|--------|-----------------------------|-------|---------------------------------|-------|
| Round            | n  | Nucleotide Mutations |       |              |       |       |       | Amino Acid Mutations |       |         |       | Na/Nt |        | Percent Identity to wtVIM-2 |       | Percent Identity within Library |       |
|                  |    | Transition           |       | Transversion |       | Total |       | Signal Peptide       |       | Protein |       | Mean  | SEM    | Mean                        | SEM   | Mean                            | SEM   |
|                  |    | Mean                 | SEM   | Mean         | SEM   | Mean  | SEM   | Mean                 | SEM   | Mean    | SEM   |       |        |                             |       |                                 |       |
| 5                | 22 | 35                   | ± 0.8 | 14           | ± 0.6 | 49    | ± 0.7 | 6                    | ± 0.3 | 24      | ± 0.5 | 0.49  | ± 0.01 | 91.5                        | ± 0.4 | 94.3                            | ± 0.1 |
| 10               | 34 | 42                   | ± 0.9 | 16           | ± 0.5 | 59    | ± 0.9 | 7                    | ± 0.2 | 28      | ± 0.6 | 0.47  | ± 0.01 | 89.8                        | ± 0.3 | 92.1                            | ± 0.1 |
| 15               | 21 | 46                   | ± 0.4 | 19           | ± 0.7 | 65    | ± 1.6 | 7                    | ± 0.2 | 30      | ± 0.7 | 0.46  | ± 0.01 | 88.7                        | ± 0.3 | 91.0                            | ± 0.1 |
| 20               | 28 | 51                   | ± 1.0 | 20           | ± 0.7 | 71    | ± 1.1 | 8                    | ± 0.3 | 31      | ± 0.8 | 0.44  | ± 0.01 | 88.1                        | ± 0.3 | 90.8                            | ± 0.1 |
| 30               | 30 | 59                   | ± 1.0 | 25           | ± 0.7 | 84    | ± 0.9 | 9                    | ± 0.4 | 35      | ± 0.5 | 0.42  | ± 0.01 | 86.8                        | ± 0.2 | 88.7                            | ± 0.1 |
| 40               | 31 | 63                   | ± 0.9 | 25           | ± 0.7 | 88    | ± 1.2 | 10                   | ± 0.4 | 37      | ± 0.7 | 0.42  | ± 0.01 | 86.0                        | ± 0.3 | 88.2                            | ± 0.1 |
| 50               | 20 | 73                   | ± 1.4 | 31           | ± 1.0 | 103   | ± 1.3 | 9                    | ± 0.5 | 41      | ± 0.9 | 0.40  | ± 0.01 | 84.8                        | ± 0.4 | 86.3                            | ± 0.1 |
| 60               | 24 | 76                   | ± 1.2 | 31           | ± 1.0 | 107   | ± 1.4 | 11                   | ± 0.3 | 43      | ± 0.7 | 0.41  | ± 0.01 | 83.8                        | ± 0.2 | 85.9                            | ± 0.1 |
| 80               | 28 | 86                   | ± 1.3 | 38           | ± 1.2 | 124   | ± 1.5 | 12                   | ± 0.4 | 47      | ± 0.8 | 0.38  | ± 0.00 | 81.4                        | ± 0.4 | 83.3                            | ± 0.1 |
| 100              | 20 | 98                   | ± 1.1 | 43           | ± 1.3 | 141   | ± 2.0 | 13                   | ± 0.6 | 52      | ± 1.1 | 0.37  | ± 0.01 | 80.4                        | ± 0.4 | 82.7                            | ± 0.2 |

712

713 **Supplementary Table 3. Genotypic analysis of the AW, ND<sub>Hi</sub> and ND<sub>Lo</sub> libraries.** Mean and standard error of  
714 nucleotide mutations (transitions and transversions) and amino acid mutations in the signal peptide and the mature  
715 protein; N<sub>a</sub>/(N<sub>t</sub>), percent sequence identity shared with wtVIM-2 and within the library are given for 24-96 individual  
716 variants from the evolution libraries. For the raw data used to calculate these values, refer to **Supplementary Data**  
717 **2.**

Supplementary Table 4 | Resistance phenotype characteristics of ND<sub>Lo-wt</sub> libraries .

|                           | n | EC <sub>50</sub> | EC <sub>10</sub> | EC <sub>90</sub> | EC <sub>90</sub> / EC <sub>10</sub> |
|---------------------------|---|------------------|------------------|------------------|-------------------------------------|
| wtVIM-2                   | 2 | 134 ± 9          | 103 ± 5          | 177 ± 37         | 1.7 ± 0.45                          |
| ND <sub>Lo-wt</sub> VIM-2 |   |                  |                  |                  |                                     |
| Round                     | n | EC <sub>50</sub> | EC <sub>10</sub> | EC <sub>90</sub> | EC <sub>90</sub> / EC <sub>10</sub> |
| 1                         | 2 | 110 ± 3          | 56 ± 12          | 225 ± 38         | 4.3 ± 1.6                           |
| 2                         | 3 | 95 ± 5           | 48 ± 5           | 191 ± 21         | 4.1 ± 0.8                           |
| 3                         | 2 | 88 ± 4           | 36 ± 8           | 221 ± 28         | 6.6 ± 2.3                           |
| 4                         | 3 | 79 ± 4           | 31 ± 2           | 206 ± 18         | 6.8 ± 0.8                           |
| 5                         | 2 | 79 ± 4           | 27 ± 2           | 232 ± 3          | 8.6 ± 0.5                           |
| 6                         | 3 | 65 ± 7           | 19 ± 3           | 221 ± 10         | 12 ± 2.1                            |
| 7                         | 1 | 75               | 25               | 226              | 9.1                                 |
| 8                         | 2 | 73 ± 13          | 24 ± 9           | 230 ± 8          | 11 ± 3.8                            |
| 9                         | 2 | 70 ± 15          | 23 ± 12          | 221 ± 1          | 13 ± 6.3                            |
| 10                        | 3 | 63 ± 9           | 19 ± 5           | 212 ± 11         | 12 ± 2.4                            |
| 11                        | 2 | 51 ± 2           | 13               | 197 ± 8          | 15                                  |
| 12                        | 2 | 50 ± 2           | 13 ± 1           | 191 ± 5          | 15 ± 0.6                            |
| 13                        | 2 | 52 ± 1           | 14               | 195 ± 3          | 14 ± 0.1                            |
| 14                        | 2 | 60 ± 2           | 17               | 209 ± 14         | 12 ± 0.7                            |
| 15                        | 1 | 62               | 14               | 210              | 15                                  |

718

719 **Supplementary Table 4. Population-level phenotypic analysis of the ND<sub>Lo-wt</sub> libraries.** The median ampicillin  
 720 resistance level (EC<sub>50</sub>), and within-library phenotypic diversity (calculated by dividing the EC<sub>90</sub> and EC<sub>10</sub> for ampicillin  
 721 of the experimental evolution libraries, alongside their SEM values are shown derived from ampicillin dose response  
 722 assays in (µg/mL). ‘n’ reflects the number of independent dose-response assays conducted for each library. For the  
 723 raw data used to calculate these values, refer to **Supplementary Data 4**.

Supplementary Table 5 | Nucleotide and amino acid sequence analysis of individual variants from the ND<sub>Lo-wt</sub> libraries.

| Round | n  | ND <sub>Lo-wt</sub>  |              |          |                      |          |             | Na/Nt      | Percent Identity to wtVIM-2 | Percent Identity within Library |
|-------|----|----------------------|--------------|----------|----------------------|----------|-------------|------------|-----------------------------|---------------------------------|
|       |    | Nucleotide Mutations |              |          | Amino Acid Mutations |          |             |            |                             |                                 |
|       |    | Transition           | Transversion | Total    | Signal Peptide       | Protein  | Mean        |            |                             |                                 |
| 1     | 5  | 1 ± 0.3              | 1 ± 0.4      | 2 ± 0.6  | 0 ± 0.0              | 1 ± 0.7  | 0.70 ± 0.20 | 99.5 ± 0.3 | 98.9 ± 0.2                  |                                 |
| 2     | 3  | 3 ± 0.9              | 2 ± 0.7      | 4 ± 1.2  | 0 ± 0.0              | 3 ± 0.9  | 0.59 ± 0.05 | 99.0 ± 0.3 | 98.2 ± 0.1                  |                                 |
| 3     | 5  | 3 ± 0.8              | 1 ± 0.9      | 4 ± 1.3  | 0 ± 0.4              | 3 ± 0.9  | 0.77 ± 0.12 | 98.9 ± 0.3 | 97.9 ± 0.3                  |                                 |
| 4     | 6  | 5 ± 0.8              | 2 ± 0.6      | 7 ± 1.2  | 1 ± 0.3              | 4 ± 1.1  | 0.54 ± 0.10 | 98.5 ± 0.4 | 97.0 ± 0.3                  |                                 |
| 5     | 9  | 5 ± 0.7              | 1 ± 0.3      | 7 ± 0.6  | 1 ± 0.4              | 4 ± 0.5  | 0.55 ± 0.05 | 98.6 ± 0.2 | 97.3 ± 0.1                  |                                 |
| 6     | 15 | 6 ± 0.8              | 3 ± 0.5      | 9 ± 1.0  | 2 ± 0.3              | 6 ± 0.7  | 0.64 ± 0.04 | 97.8 ± 0.3 | 95.9 ± 0.1                  |                                 |
| 7     | 14 | 8 ± 1.3              | 3 ± 0.4      | 11 ± 1.5 | 2 ± 0.4              | 6 ± 0.9  | 0.55 ± 0.05 | 97.8 ± 0.3 | 96.0 ± 0.2                  |                                 |
| 8     | 2  | 7 ± 1.0              | 5 ± 2.0      | 12 ± 1.0 | 1 ± 0.5              | 9 ± 0.5  | 0.71 ± 0.02 | 96.8 ± 0.2 | 93.6 ± -                    |                                 |
| 10    | 14 | 10 ± 1.1             | 5 ± 0.8      | 15 ± 1.4 | 2 ± 0.4              | 8 ± 0.9  | 0.55 ± 0.03 | 97.0 ± 0.3 | 93.2 ± 1.0                  |                                 |
| 12    | 3  | 16 ± 1.0             | 6 ± 0.3      | 22 ± 1.3 | 5 ± 0.7              | 11 ± 0.0 | 0.51 ± 0.03 | 95.9 ± 0.0 | 92.1 ± 0.2                  |                                 |
| 15    | 5  | 19 ± 1.9             | 6 ± 1.4      | 24 ± 1.7 | 4 ± 0.9              | 14 ± 1.5 | 0.57 ± 0.05 | 94.5 ± 0.6 | 91.0 ± 0.8                  |                                 |

724 **Supplementary Table 5. Genotypic analysis of the ND<sub>Lo-wt</sub> libraries.** Mean and standard error of nucleotide  
 725 mutations (transitions and transversions) and amino acid mutations in the signal peptide and the mature protein;  
 726 N<sub>a</sub>/N<sub>t</sub>, percent sequence identity shared with wtVIM-2 and within the library are given for 2-15 individual variants  
 727 from the evolution libraries. For the raw data used to calculate these values, refer to **Supplementary Data 2**.  
 728

Supplementary  
Table 6  
Resistance phenotype of  
highly-resistant individual  
variants from ND<sub>Lo-wt</sub>.

|                                | EC <sub>50</sub> |
|--------------------------------|------------------|
| wtVIM-2                        | 137              |
| ND <sub>Lo-wt</sub><br>Variant | EC <sub>50</sub> |
| R8-1                           | 646              |
| R8-2                           | 316              |
| R10-1                          | 478              |
| R10-2                          | 584              |
| R10-3                          | 378              |
| R12-1                          | 778              |
| R12-2                          | 585              |
| R15-1                          | 549              |
| R15-2                          | 567              |
| R15-3                          | 526              |

729

730 **Supplementary Table 6. Phenotypic analysis of individual ND<sub>Lo-wt</sub> trajectory variants.** Ampicillin EC<sub>50</sub> (µg/mL) values  
731 of randomly selected individual variants from R8, R10, R12 and R15 libraries of the ND<sub>Lo-wt</sub> trajectory that confer  
732 ampicillin resistance levels >30 higher than the selection threshold (10 µg/mL), determined by dose-response assays  
733 (Methods). The median ampicillin resistance level (EC<sub>50</sub>) of randomly selected individual variants from R8, R10, R12  
734 and R15 libraries of the ND<sub>Lo-wt</sub> trajectory that confer ampicillin resistance levels >30 higher than the selection  
735 threshold (10 µg/mL) are shown in (µg/mL). For the raw data used to calculate these values, refer to **Supplementary**  
736 **Data 4.**

737 **References:**

738

739 1. Barrett, R. D. H. & Schluter, D. Adaptation from standing genetic variation. *Trends Ecol Evol*  
740 23, 38–44 (2008).

741 2. Lai, Y.-T. *et al.* Standing genetic variation as the predominant source for adaptation of a  
742 songbird. *Proc National Acad Sci* 116, 2152–2157 (2019).

743 3. McGuigan, K. & Sgrò, C. M. Evolutionary consequences of cryptic genetic variation. *Trends*  
744 *Ecol Evol* 24, 305–311 (2009).

745 4. Houle, D. Comparing evolvability and variability of quantitative traits. *Genetics* 130, 195–204  
746 (1992).

747 5. Paaby, A. B. & Rockman, M. V. Cryptic genetic variation: evolution's hidden substrate. *Nat*  
748 *Rev Genet* 15, 247–258 (2014).

749 6. Teotónio, H., Chelo, I. M., Bradić, M., Rose, M. R. & Long, A. D. Experimental evolution  
750 reveals natural selection on standing genetic variation. *Nat Genet* 41, 251–257 (2009).

- 751 7. Perry, J., Waglechner, N. & Wright, G. The Prehistory of Antibiotic Resistance. *Csh Perspect*  
752 *Med* 6, a025197 (2016).
- 753 8. Mitchell-Olds, T., Willis, J. H. & Goldstein, D. B. Which evolutionary processes influence  
754 natural genetic variation for phenotypic traits? *Nat Rev Genet* 8, 845–856 (2007).
- 755 9. Benfey, P. N. & Mitchell-Olds, T. From Genotype to Phenotype: Systems Biology Meets  
756 Natural Variation. *Science* 320, 495–497 (2008).
- 757 10. Ellegren, H. & Sheldon, B. C. Genetic basis of fitness differences in natural populations.  
758 *Nature* 452, 169–175 (2008).
- 759 11. Khersonsky, O. & Tawfik, D. S. Enzyme Promiscuity: A Mechanistic and Evolutionary  
760 Perspective. *Annu Rev Biochem* 79, 471–505 (2010).
- 761 12. Schlichting, C. D. Hidden Reaction Norms, Cryptic Genetic Variation, and Evolvability. *Ann Ny*  
762 *Acad Sci* 1133, 187–203 (2008).
- 763 13. Wistrand-Yuen, E. *et al.* Evolution of high-level resistance during low-level antibiotic  
764 exposure. *Nat Commun* 9, 1599 (2018).
- 765 14. Gu, Y. *et al.* The Evolution of Fluoroquinolone Resistance in Salmonella under Exposure to  
766 Sub-Inhibitory Concentration of Enrofloxacin. *Int J Mol Sci* 22, 12218 (2021).
- 767 15. Ramsay, K. A., McTavish, S. M., Wardell, S. J. T. & Lamont, I. L. The Effects of Sub-inhibitory  
768 Antibiotic Concentrations on *Pseudomonas aeruginosa*: Reduced Susceptibility Due to  
769 Mutations. *Front Microbiol* 12, 789550 (2021).
- 770 16. Fröhlich, C. *et al.* Cryptic  $\beta$ -lactamase evolution is driven by low  $\beta$ -lactam concentrations.  
771 *Biorxiv* 2020.12.01.404343 (2020) doi:10.1101/2020.12.01.404343.
- 772 17. Kaltenbach, M. & Tokuriki, N. Dynamics and constraints of enzyme evolution. *J Exp Zoology*  
773 *Part B Mol Dev Evol* 322, 468–487 (2014).
- 774 18. Romero, P. A. & Arnold, F. H. Exploring protein fitness landscapes by directed evolution. *Nat*  
775 *Rev Mol Cell Bio* 10, 866–876 (2009).
- 776 19. Amitai, G., Gupta, R. D. & Tawfik, D. S. Latent evolutionary potentials under the neutral  
777 mutational drift of an enzyme. *Hfsp J* 1, 67–78 (2007).
- 778 20. Bloom, J. D., Romero, P. A., Lu, Z. & Arnold, F. H. Neutral genetic drift can alter promiscuous  
779 protein functions, potentially aiding functional evolution. *Biol Direct* 2, 17 (2007).

- 780 21. Rockah-Shmuel, L., Tóth-Petróczy, Á. & Tawfik, D. S. Systematic Mapping of Protein  
781 Mutational Space by Prolonged Drift Reveals the Deleterious Effects of Seemingly Neutral  
782 Mutations. *Plos Comput Biol* 11, e1004421 (2015).
- 783 22. Rix, G. *et al.* Scalable continuous evolution for the generation of diverse enzyme variants  
784 encompassing promiscuous activities. *Nat Commun* 11, 5644 (2020).
- 785 23. Kaltenbach, M. & Tokuriki, N. Directed Evolution Library Creation, Methods and Protocols.  
786 *Methods Mol Biology* 1179, 69–81 (2014).
- 787 24. Bershtein, S., Goldin, K. & Tawfik, D. S. Intense Neutral Drifts Yield Robust and Evolvable  
788 Consensus Proteins. *J Mol Biol* 379, 1029–1044 (2008).
- 789 25. Chen, J. Z., Fowler, D. M. & Tokuriki, N. Comprehensive exploration of the translocation,  
790 stability and substrate recognition requirements in VIM-2 lactamase. *Elife* 9, e56707 (2020).
- 791 26. Chen, J. Z., Fowler, D. M. & Tokuriki, N. Environmental selection and epistasis in an empirical  
792 phenotype–environment–fitness landscape. *Nat Ecol Evol* 6, 427–438 (2022).
- 793 27. Lahti, D. C. *et al.* Relaxed selection in the wild. *Trends Ecol Evol* 24, 487–496 (2009).
- 794 28. Hunt, B. G. *et al.* Relaxed selection is a precursor to the evolution of phenotypic plasticity.  
795 *Proc National Acad Sci* 108, 15936–15941 (2011).
- 796 29. Gullberg, E. *et al.* Selection of Resistant Bacteria at Very Low Antibiotic Concentrations. *Plos*  
797 *Pathog* 7, e1002158 (2011).
- 798 30. Hughes, D. & Andersson, D. I. Evolutionary Trajectories to Antibiotic Resistance. *Annu Rev*  
799 *Microbiol* 71, 1–18 (2016).
- 800 31. Houle, D., Morikawa, B. & Lynch, M. Comparing Mutational Variabilities. *Genetics* 143,  
801 1467–1483 (1996).
- 802 32. Zhang, X.-S. & Hill, W. G. Genetic variability under mutation selection balance. *Trends Ecol*  
803 *Evol* 20, 468–470 (2005).
- 804 33. Goyal, S. *et al.* Dynamic Mutation–Selection Balance as an Evolutionary Attractor. *Genetics*  
805 191, 1309–1319 (2012).
- 806 34. Davies, J. & Davies, D. Origins and Evolution of Antibiotic Resistance. *Microbiol Mol Biol R*  
807 74, 417–433 (2010).
- 808 35. Larsson, D. G. J. & Flach, C.-F. Antibiotic resistance in the environment. *Nat Rev Microbiol*  
809 20, 257–269 (2022).

- 810 36. Zhang, X.-X., Zhang, T. & Fang, H. H. P. Antibiotic resistance genes in water environment.  
811 *Appl Microbiol Biot* 82, 397–414 (2009).
- 812 37. Goulas, A. *et al.* How effective are strategies to control the dissemination of antibiotic  
813 resistance in the environment? A systematic review. *Environ Évid* 9, 4 (2020).
- 814 38. Hartl, D. L., Dykhuizen, D. E. & Dean, A. M. LIMITS OF ADAPTATION: THE EVOLUTION OF  
815 SELECTIVE NEUTRALITY. *Genetics* 111, 655–674 (1985).
- 816 39. Roff, D. A. Evolution of threshold traits: the balance between directional selection, drift and  
817 mutation. *Heredity* 80, 25–32 (1998).
- 818 40. DePristo, M. A., Weinreich, D. M. & Hartl, D. L. Missense meanderings in sequence space: a  
819 biophysical view of protein evolution. *Nat Rev Genet* 6, 678–687 (2005).
- 820 41. Tokuriki, N. & Tawfik, D. S. Stability effects of mutations and protein evolvability. *Curr Opin*  
821 *Struc Biol* 19, 596–604 (2009).
- 822 42. Bershtein, S., Serohijos, A. W. & Shakhnovich, E. I. Bridging the physical scales in  
823 evolutionary biology: from protein sequence space to fitness of organisms and populations.  
824 *Curr Opin Struc Biol* 42, 31–40 (2017).
- 825 43. Firnberg, E., Labonte, J. W., Gray, J. J. & Ostermeier, M. A Comprehensive, High-Resolution  
826 Map of a Gene's Fitness Landscape. *Mol Biol Evol* 31, 1581–1592 (2014).
- 827 44. Sarkisyan, K. S. *et al.* Local fitness landscape of the green fluorescent protein. *Nature* 533,  
828 397–401 (2016).
- 829 45. Bar-Even, A. *et al.* The Moderately Efficient Enzyme: Evolutionary and Physicochemical  
830 Trends Shaping Enzyme Parameters. *Biochemistry-us* 50, 4402–4410 (2011).
- 831 46. Labourel, F. & Rajon, E. Resource uptake and the evolution of moderately efficient enzymes.  
832 *Mol Biol Evol* 38, msab132- (2021).
- 833 47. Karve, S., Dasmeh, P., Zheng, J. & Wagner, A. Low protein expression enhances phenotypic  
834 evolvability by intensifying selection on folding stability. *Nat Ecol Evol* 6, 1155–1164 (2022).
- 835 48. Kimura, M. On the probability of fixation of mutant genes in a population. *Genetics* 47, 713–  
836 719 (1962).
